# Supplementary material for: Electrochemical hydrogen generation by a four-coordinate square-planar Ni(ii) complex with an N2P2-type ligand
Source: Royal Society of Chemistry journal article supplement (doi:10.1039/d4ya00345d), 2024-01-01
Supplement: d4ya00345d1.pdf [file d4ya00345d1.pdf]

## Supporting Information

### Electrochemical hydrogen generation by four-coordinate square-planar Ni(II) complex with N<sub>2</sub>P<sub>2</sub>-type ligand

Hidenori Miyake,<sup>a</sup> Satomi Hirasawa,<sup>a</sup> Yurika Uno,<sup>a</sup> Kenichi Nakao,<sup>a</sup> Takuma Kato,<sup>a</sup>  
Yuko Wasada-Tsutsui,<sup>a</sup> Yoshikuni Hara,<sup>a</sup> Tomohiro Ozawa,<sup>a</sup> Tomohiko Inomata,<sup>a</sup>  
and Hideki Masuda<sup>a,b\*</sup>

<sup>a</sup>*Department of Life Science and Applied Chemistry, Graduate School of Engineering,  
Nagoya Institute of Technology, Gokiso-cho, Showa-ku, Nagoya 466-8555, Japan.*

<sup>b</sup>*Department of Applied Chemistry, Faculty of Engineering, Aichi Institute of Technology,  
1247 Yachigusa, Yakusa-cho, Toyota 470-0392, Japan.*

#### Contents

|                                                                                                                                                                                                                                                                                                                                                   |        |
|---------------------------------------------------------------------------------------------------------------------------------------------------------------------------------------------------------------------------------------------------------------------------------------------------------------------------------------------------|--------|
| Fig. S1. UV-vis spectrum (230 ~ 1030 nm) of [Ni(L <sub>H</sub> ) <sub>2</sub> ](BF <sub>4</sub> ) <sub>2</sub> (1.0 mM) in CH <sub>2</sub> Cl <sub>2</sub> .                                                                                                                                                                                      | ...S4  |
| Fig. S2. <sup>1</sup> H-NMR spectrum of complex <b>1</b> (1.0 mM) in MeCN- <i>d</i> <sub>3</sub> . (Upper) Wide and (below) normal ranges. Attribution of NMR spectra of paramagnetic species is very difficult and their peak intensities are not meaningful to discuss. It is beyond the scope of this study and were therefore not attributed. | ...S5  |
| Fig. S3. <sup>31</sup> P{ <sup>1</sup> H} NMR spectrum of complex <b>1</b> (1.0 mM) in MeCN- <i>d</i> <sub>3</sub> .                                                                                                                                                                                                                              | ...S6  |
| Fig. S4. <sup>1</sup> H-NMR spectrum of complex <b>1</b> (1.0 mM) in CD <sub>2</sub> Cl <sub>2</sub> . (Upper) Wide and (below) normal ranges.                                                                                                                                                                                                    | ...S7  |
| Fig. S5. <sup>31</sup> P{ <sup>1</sup> H} NMR spectrum of complex <b>1</b> (1.0 mM) in CD <sub>2</sub> Cl <sub>2</sub> .                                                                                                                                                                                                                          | ...S7  |
| Fig. S6. CV of ligand L <sub>H</sub> in the range of 0 ~ -2.7 V in MeCN, measured at several sweep rates under the same measurement conditions as complex <b>1</b> .                                                                                                                                                                              | ...S7  |
| Fig. S7. DPV of [Ni(L <sub>H</sub> ) <sub>2</sub> ](BF <sub>4</sub> ) <sub>2</sub> in MeCN.                                                                                                                                                                                                                                                       | ...S8  |
| Fig. S8. UV-vis spectra of complex <b>1</b> (1.0 mM) in the presence (0 ~ 50 μL (290 equiv.)) of AcOH in MeCN.                                                                                                                                                                                                                                    | ...S9  |
| Fig. S9 (a) CVs of complex <b>1</b> (1.0 mM) in MeCN containing 0.1 M TBAP in the presence of 0 - 203 equiv. of AcOD at room temperature under Ar atmosphere, recorded at a scan rate of 500 mV/s.                                                                                                                                                | ...S10 |
| Fig. S9. (b) Plots of <i>i</i> <sub>cat</sub> / <i>i</i> <sub>p</sub> mA vs. (AcOH or AcOD) <sup>1/2</sup> /(mmol/L) <sup>1/2</sup> for complex <b>1</b> (1.0 mM) in the presence of 0 - 203 equiv. of AcOH or AcOD in MeCN containing 0.1 M TBAP at room temperature under Ar atmosphere, recorded at a scan rate of 500 mV/s.                   | ...S10 |
| Fig. S10. ESI-MS spectrum (in the positive mode) of the solution prepared from the reaction of Ni <sup>0</sup> (COD) <sub>2</sub> , L <sub>H</sub> and NH <sub>4</sub> PF <sub>6</sub> in THF at -90 °C under anaerobic condition. The wide                                                                                                       |        |

- range (top) and local range and its simulation (bottom) assignable to ion cluster of  $[\text{Ni}^{\text{II}}\text{H}(\text{L}_\text{H})_2]^+$ . ...S11
- Fig. S11.  $^1\text{H}$  NMR spectrum of the products obtained by the reaction of  $\text{Ni}^0(\text{COD})_2$  with  $\text{NH}_4\text{PF}_6$  in  $\text{THF}-d_8$  at  $-90^\circ\text{C}$  in degassed NMR sample tube. ...S12
- Fig. S12. UV-vis spectra of complex **1** (0.1 mM) in the presence of 0 – 2.0 equiv. of  $\text{TBA}^+\text{AcO}^-$  in MeCN at room temperature under Ar atmosphere. ...S13
- Fig. S13. CVs of complex **1** (1.0 mM) in MeCN containing 0.1 M TBAP in the presence of 0 – 2.0 equiv. of  $\text{TBA}^+\text{AcO}^-$  at room temperature under Ar atmosphere, recorded at a scan rate of 100 mV/s. ...S14
- Fig. S14. The optimized structures of the desolvated  $[\text{Ni}^{\text{II}}(\text{L}_\text{H})_2]^{2+}$  in (a) the low- and (b) high-spin states and the MeCN-solvated  $[\text{Ni}^{\text{II}}(\text{L}_\text{H})_2(\text{MeCN})_2]^{2+}$  in (c) the low- and (d) high-spin states. Red, yellow, blue, green, white circles denote Ni, P, N, C, and H atoms, respectively. Bond angles shown by arcs and the distances shown by dashed lines are in degrees and angstroms, respectively. ...S15
- Fig. S15. The optimized structures of Ni(0) complex,  $[\text{Ni}^0(\text{L}_\text{H})_2]^0$ , together with the relative energies in Gibbs free energy at 298.15 K. (a) The four-coordinated structure with bond lengths of Ni—P = 2.130 Å and Ni—N = 2.005 Å, respectively. (b) The three-coordinated structure with a free pyridyl group and bond lengths of Ni—P(1) = 2.119 Å, Ni—P(2) = 2.098 Å, and Ni—N = 1.936 Å. Color scheme is as in Fig. S14. Bond angles are in degrees. ...S16
- Fig. S16. The optimized structures of desolvated high-spin hydride Ni(II) complexes. Color scheme and classification of square pyramidal structures are as in Fig. S14. ...S17
- Fig. S17. The optimized structures of the mono-MeCN-solvated low-spin hydride Ni(II) complexes. Color scheme is as in Fig. S14. Gray sticks between donor atoms and Ni center represent distances longer than 2.5 Å. The distances are shown in Å. The labeling of the structures is the same as the original desolvated analogues in Fig. S14, because the MeCN ligation, which occurs at the empty site of the desolvated complexes, has no significant effect on the coordination geometry, except that some ligands are pushed away from the Ni centre. ...S18
- Fig. S18. The optimized structures of mono-MeCN-solvated high-spin hydride Ni(II) complexes. Color scheme and classification of square pyramidal structures are as in Fig. S14. The bond lengths are shown in Å. ...S19
- Fig. S19. Orbital energy level diagrams of the low-spin (*trans*-N, apex-N) hydride Ni(II) complex  $[\text{Ni}^{\text{II}}\text{H}(\text{L}_\text{H})_2]^{2+}$  (right side) and its mono-MeCN-solvated analogue (left side). The orbitals assigned to the d orbital on the Ni centre and the 1s orbital on the hydrido ligand are depicted. The values in parentheses indicate the percentage of d-orbital components. The orbital isosurfaces are  $\pm 0.06$  a.u. The orbital diagram of the HOMO–14 is shown in Fig. S20(a). The splitting levels of orbital energies mean that the orbitals contain the same orbital component: e.g. the  $3d_{xy}$  orbital on the Ni centre is mixed in the HOMO–8 and HOMO–11. Certain weights of the  $d_{x^2-y^2}$  orbital are found in the LUMO+1 and LUMO+12. ...S20
- Fig. S20. The Ni—H (a) bonding and (b) antibonding orbitals. The values of orbital isosurfaces are  $\pm 0.06$  a.u. The values in parentheses indicate the weight proportion of atomic orbitals in

|                                                                                                                                                                                                                                                                                                                                                                                                                                                                                                                                                                                                                                                                 |        |
|-----------------------------------------------------------------------------------------------------------------------------------------------------------------------------------------------------------------------------------------------------------------------------------------------------------------------------------------------------------------------------------------------------------------------------------------------------------------------------------------------------------------------------------------------------------------------------------------------------------------------------------------------------------------|--------|
| the Ni(3d) and H(1s) orbitals, for example (Ni(3d)/H(1s)).                                                                                                                                                                                                                                                                                                                                                                                                                                                                                                                                                                                                      | ...S21 |
| Fig. S21. The optimized structures of the N-apex enantiomers of the desolvated low-spin hydride Ni(II) complexes. Color scheme and classification of square pyramidal structures are as in Fig. S14: (a) the enantiomer of Fig. 6(a), (b) the enantiomer of Fig. 6(c).                                                                                                                                                                                                                                                                                                                                                                                          | ...S22 |
| Fig. S22. The energy diagrams for the complex <b>1</b> , $[\text{Ni}^{\text{II}}(\text{L}_\text{H})_2]^{2+}$ , and $[\text{Ni}^{\text{II}}(\text{L}_{\text{NH}_2})_2]^{2+}$ systems. The representation of species is as in Fig. 7. The free energy diagrams are plotted at an electrode potential equal to the $\text{Ni}^{\text{I}}/\text{Ni}^0$ reduction potential, and no free energy change for $\text{Ni}^{\text{I}}/\text{Ni}^0$ reduction. The dashed line connecting the potential energy levels for the protonation step of $[\text{Ni}^{\text{I}}(\text{L}_\text{H})_2]^+$ represents a reaction step to the thermodynamically unfavorable product. | ...S23 |
| Fig. S23. Optimized structures of the protonated Ni(I) complex with two explicit solvent molecules for $[\text{Ni}^{\text{II}}(\text{L}_{\text{NH}_2})_2]^{2+}$ systems: (a) an ammonium group forming an intramolecular H-bond to the amine group of the other ligand, (b) a pyridinium H-bonding to an MeCN molecule. Color scheme is as in Fig. S14, and formula symbols are as in Fig. 7. Gray bonds are H-bonds with distances between N atoms.                                                                                                                                                                                                            | ...S24 |
| Fig. S24. Optimized structures of deprotonated complexes for $[\text{Ni}^{\text{II}}(\text{L}_\text{H})_2]^{2+}$ systems. Color scheme is as in Fig. S14, and formula symbols are as in Fig. 7. Relative energies between isomers are shown.                                                                                                                                                                                                                                                                                                                                                                                                                    | ...S25 |
| Fig. S25 Optimized structures of protonated complexes for $[\text{Ni}^{\text{II}}(\text{L}_\text{H})_2]^{2+}$ systems. Color scheme is as in Fig. S14 and formula symbols are as in Fig. 7. Gray bonds are hydrogen bonds with distances between N or H atoms for $[\text{Ni}^{\text{II}}(\text{L}_\text{H})_2]^{2+}\text{H}^+$ and hydride complexes, respectively.                                                                                                                                                                                                                                                                                            | ...S26 |
| Table S1. Crystallographic details of $[\text{Ni}(\text{L}_\text{H})_2](\text{BF}_4)_2$ ( <b>1</b> )                                                                                                                                                                                                                                                                                                                                                                                                                                                                                                                                                            | ...S27 |
| Table S2. Bond lengths (Å) and angles (deg) for $[\text{Ni}(\text{L}_\text{H})_2](\text{BF}_4)_2$ ( <b>1</b> )                                                                                                                                                                                                                                                                                                                                                                                                                                                                                                                                                  | ...S28 |
| Table S3. Torsion angles (deg) for $[\text{Ni}(\text{L}_\text{H})_2](\text{BF}_4)_2$ ( <b>1</b> )                                                                                                                                                                                                                                                                                                                                                                                                                                                                                                                                                               | ...S31 |
| Table S4. Calculated solvation energies for species with and without protons for $[\text{Ni}^{\text{II}}(\text{L}_{\text{NH}_2})_2]^{2+}$ and $[\text{Ni}^{\text{II}}(\text{L}_\text{H})_2]^{2+}$ systems (kcal/mol).                                                                                                                                                                                                                                                                                                                                                                                                                                           | ...S34 |
| Table S5. Relative energies, Ni—H bond lengths, and natural atomic charges of hydride Ni(II) intermediates, $[\text{Ni}^{\text{II}}\text{H}(\text{L}_{\text{NH}_2})_2]^+$ .                                                                                                                                                                                                                                                                                                                                                                                                                                                                                     | ...S34 |

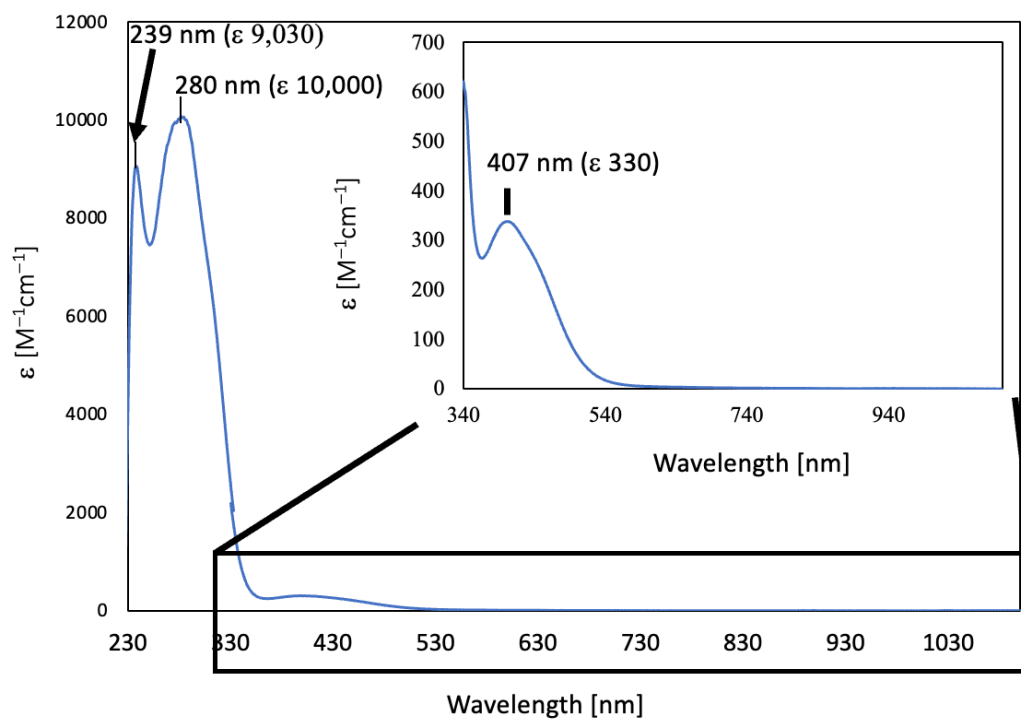

Fig. S1. UV-vis spectrum (230 ~ 1030 nm) of  $[\text{Ni}(\text{L}_\text{H})_2](\text{BF}_4)_2$  (1.0 mM) in  $\text{CH}_2\text{Cl}_2$ .

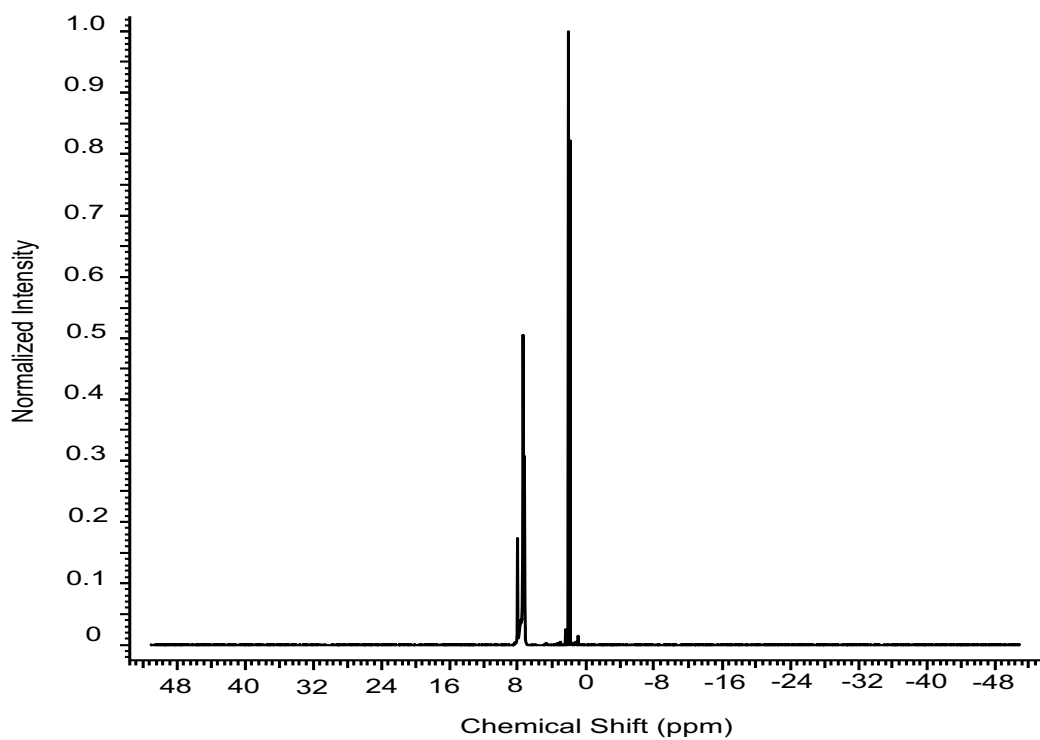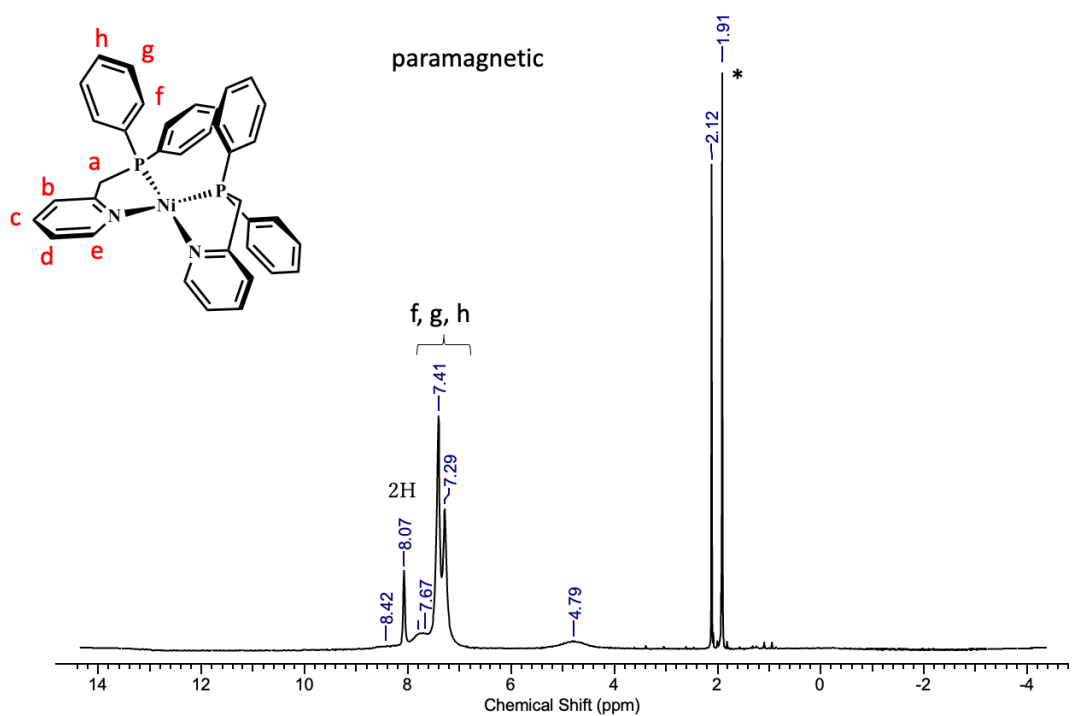

Fig. S2.  $^1\text{H}$ -NMR spectrum of complex **1** (1.0 mM) in  $\text{MeCN-}d_3$ . (Upper) Wide and (below) normal ranges. Attribution of NMR spectra of paramagnetic species is very difficult and their peak intensities are not meaningful to discuss. It is beyond the scope of this study and were therefore not attributed.

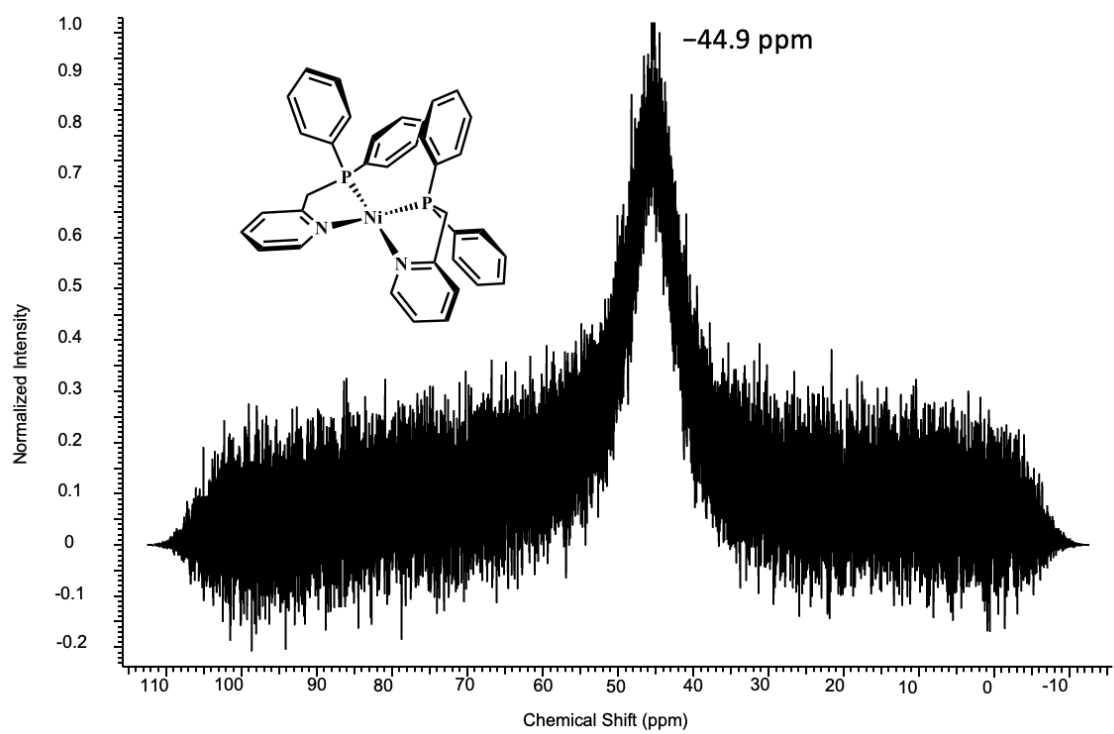

Fig. S3.  $^{31}\text{P}\{^1\text{H}\}$  NMR spectrum of complex **1** (1.0 mM) in  $\text{MeCN-}d_3$ .

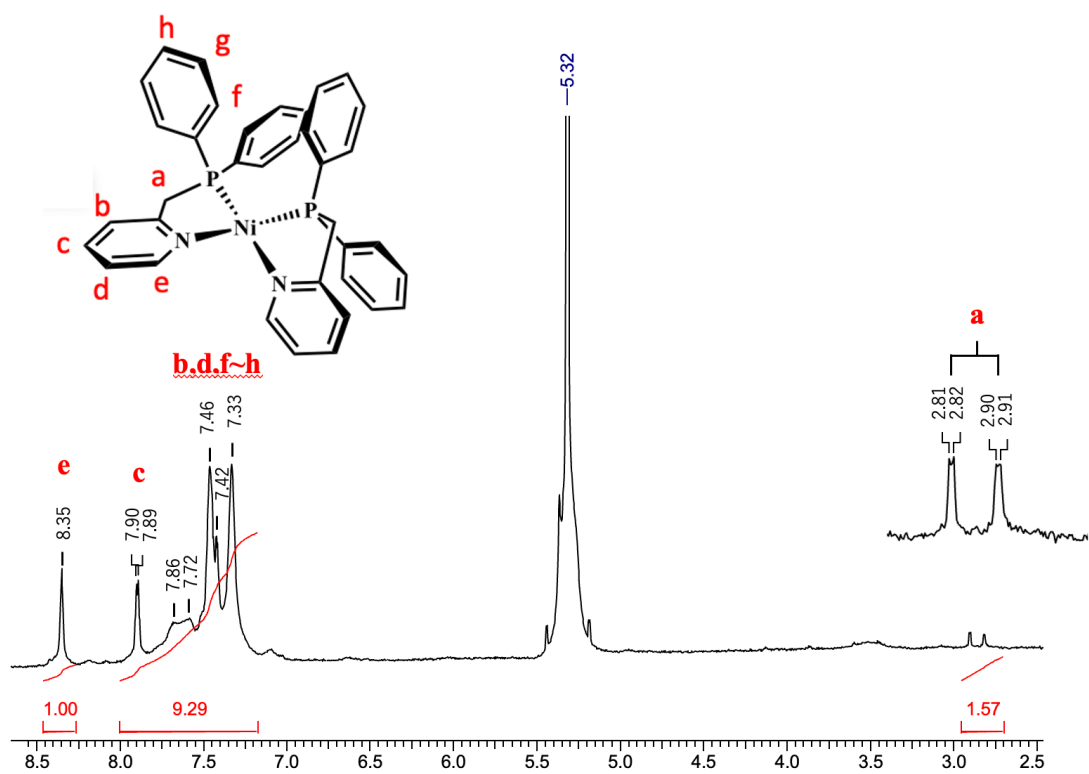

Fig. S4.  $^1\text{H-NMR}$  spectrum of complex **1** (1.0 mM) in  $\text{CD}_2\text{Cl}_2$ . (Upper) Wide and (below) normal ranges.

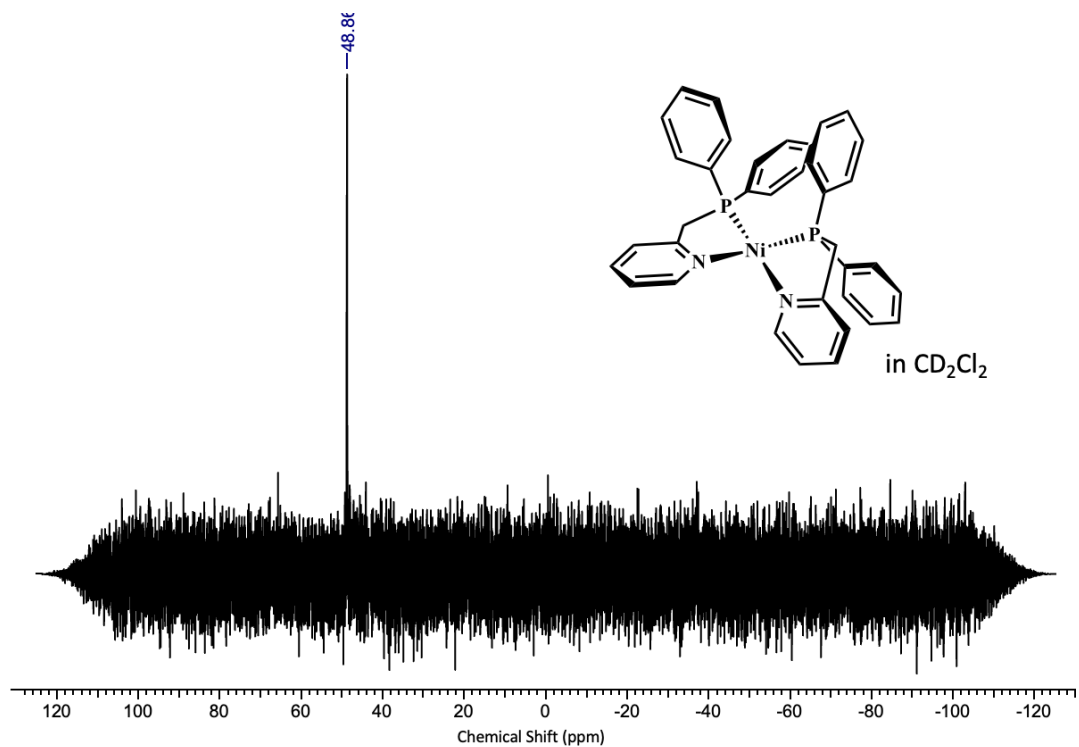

Fig. S5.  $^{31}\text{P}\{^1\text{H}\}$  NMR spectrum of complex **1** (1.0 mM) in  $\text{CD}_2\text{Cl}_2$ .

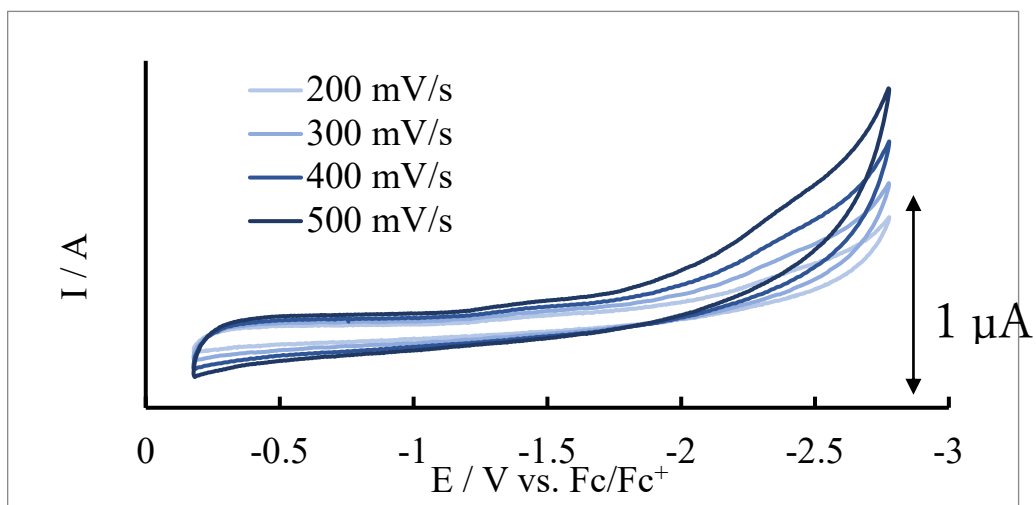

Fig. S6. CV of ligand  $L_H$  in the range of 0 ~ -2.7 V in MeCN, measured at several sweep rates under the same measurement conditions as complex 1.

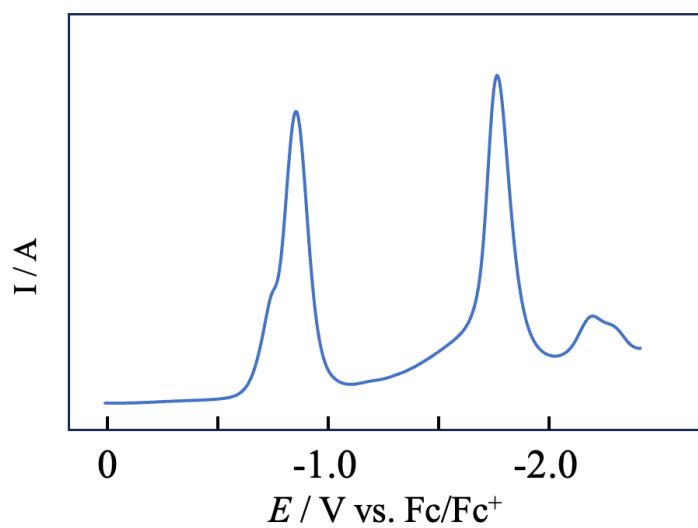

Fig. S7. DPV of  $[Ni(L_H)_2](BF_4)_2$  in MeCN as measured under the same condition as CV.



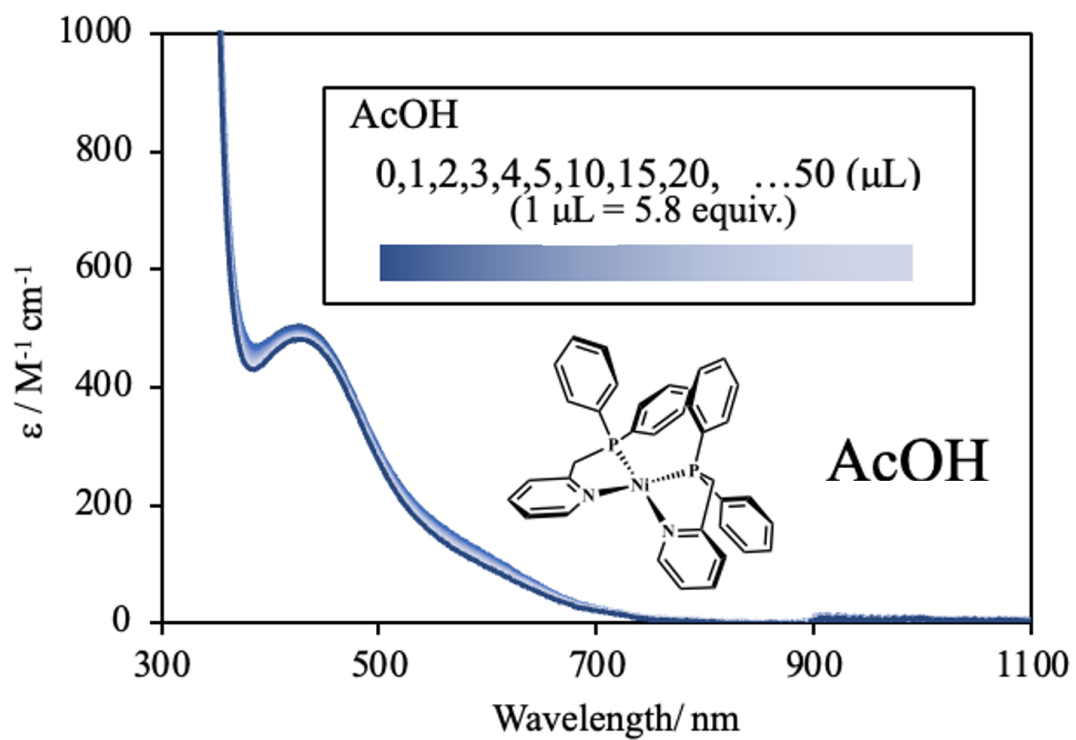

Fig. S8. UV-vis spectra of complex **1** (1.0 mM) in the presence (0 ~ 50  $\mu\text{L}$  (290 equiv.)) of AcOH in MeCN.

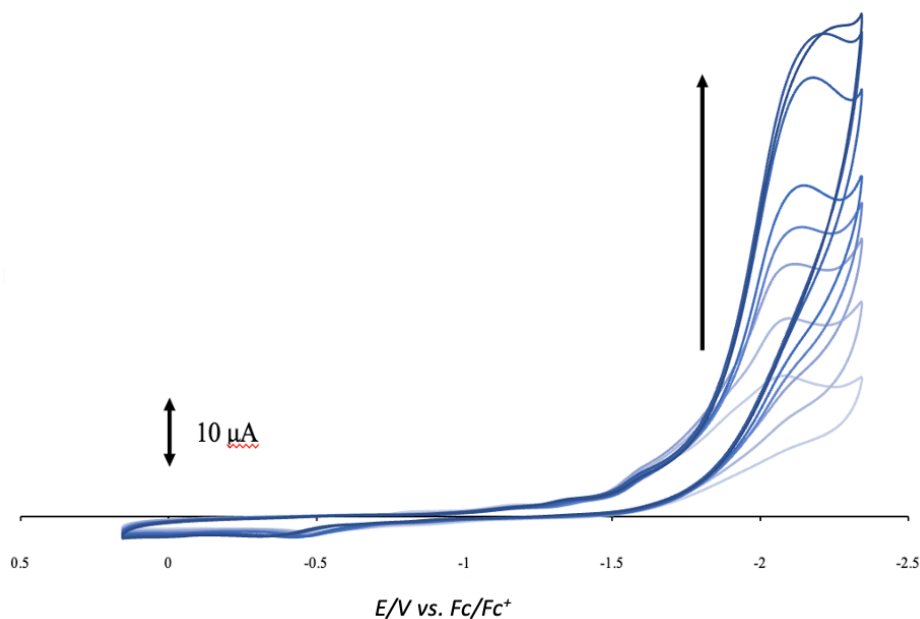

Fig. S9(a) CVs of complex **1** (1.0 mM) in MeCN containing 0.1 M TBAP in the presence of 0 - 203 equiv. of AcOD at room temperature under Ar atmosphere, recorded at a scan rate of 500 mV/s.

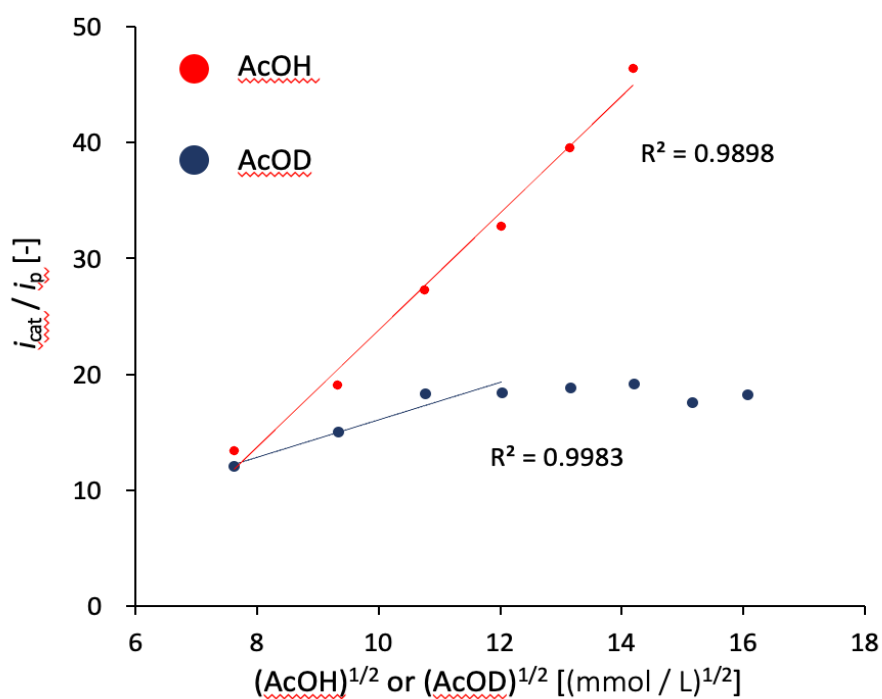

Fig. S9(b). Plots of  $i_{\text{cat}}/i_p$  mA vs.  $(\text{AcOH or AcOD})^{1/2}/(\text{mmol/L})^{1/2}$  for complex **1** (1.0 mM) in the presence of 0 - 203 equiv. of AcOH or AcOD in MeCN containing 0.1 M TBAP at room temperature under Ar atmosphere, recorded at a scan rate of 500 mV/s.

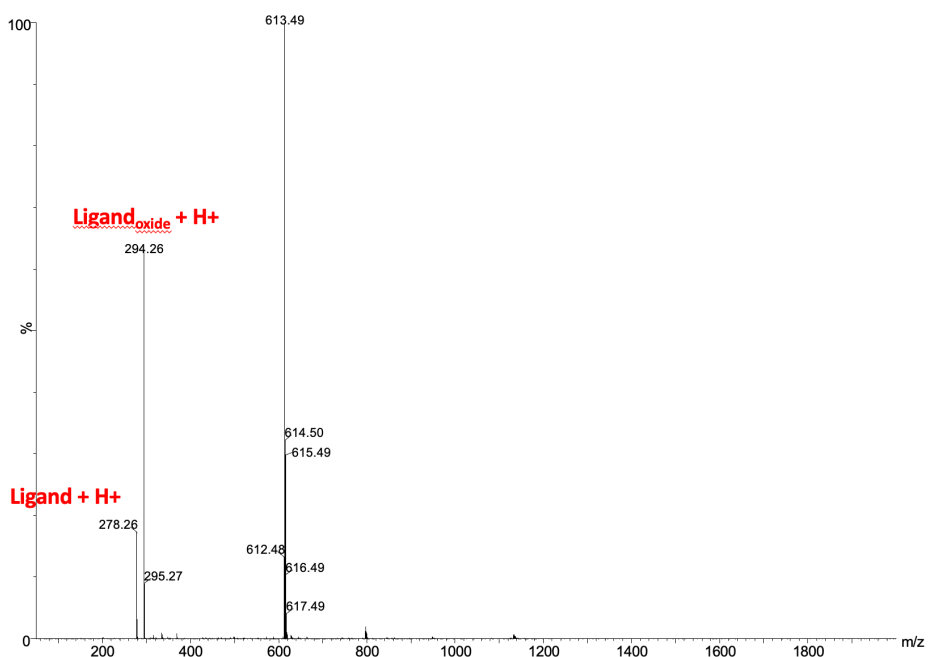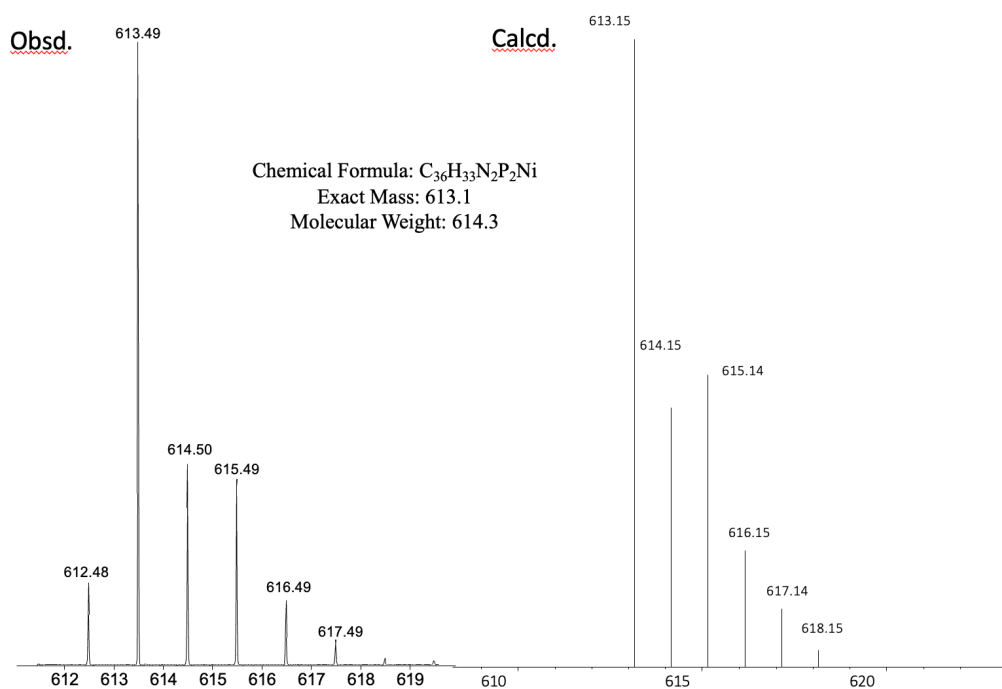

Fig. S10. ESI-MS spectrum (in the positive mode) of the solution prepared from the reaction of  $Ni^0(COD)_2$ ,  $L_H$  and  $NH_4PF_6$  in THF at  $-90^\circ C$  under anaerobic condition. The wide range (top) and local range and its simulation (bottom) assignable to ion cluster of  $[Ni^{II}H(L_H)_2]^+$ .

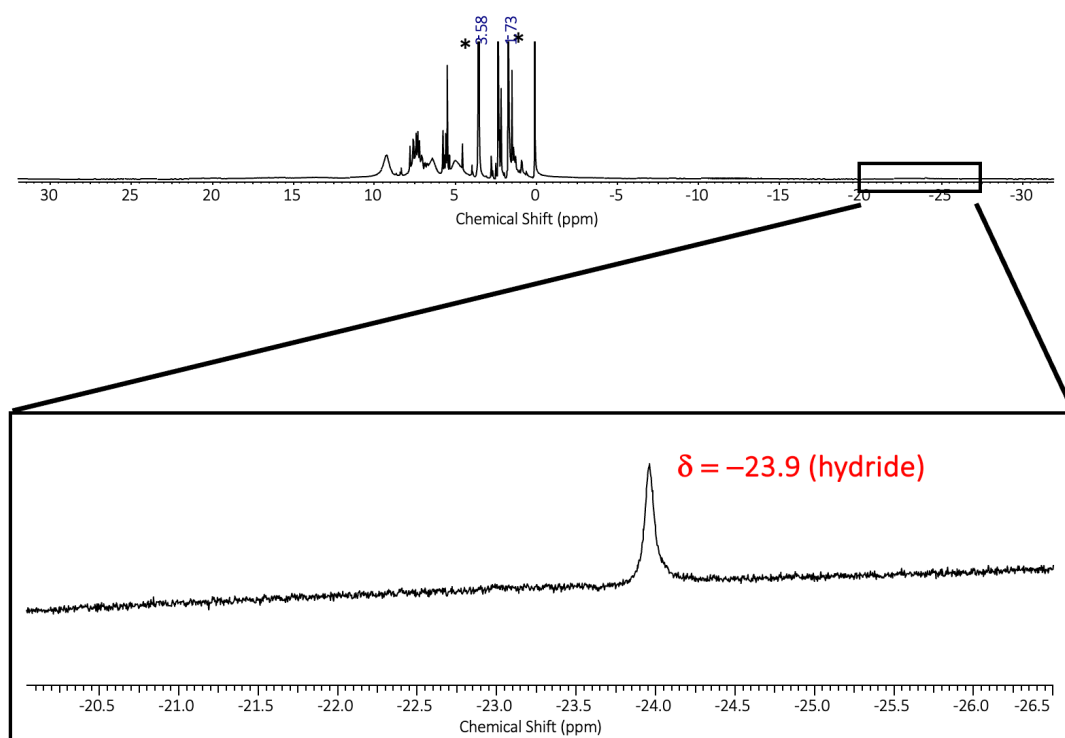

Fig. S11.  $^1\text{H}$  NMR spectrum of the products obtained by the reaction of  $\text{Ni}^0(\text{COD})_2$  with  $\text{NH}_4\text{PF}_6$  in  $\text{THF-}d_8$  at  $-90\text{ }^\circ\text{C}$  in degassed NMR sample tube.

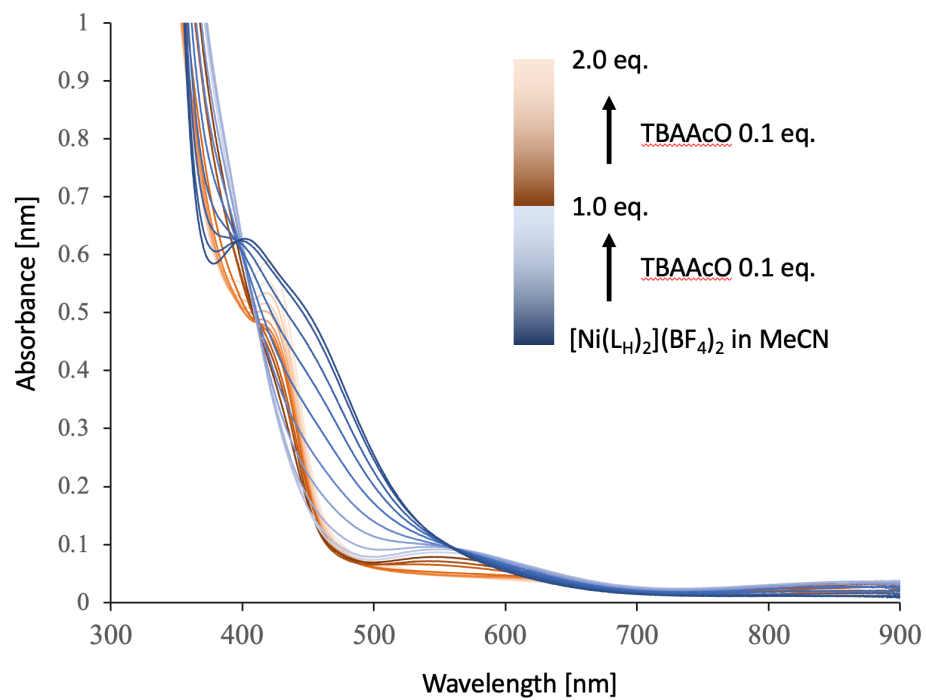

Fig. S12. UV-vis spectra of complex **1** (0.1 mM) in the presence of 0 – 2.0 equiv. of TBA<sup>+</sup>AcO<sup>-</sup> in MeCN at room temperature under Ar atmosphere.

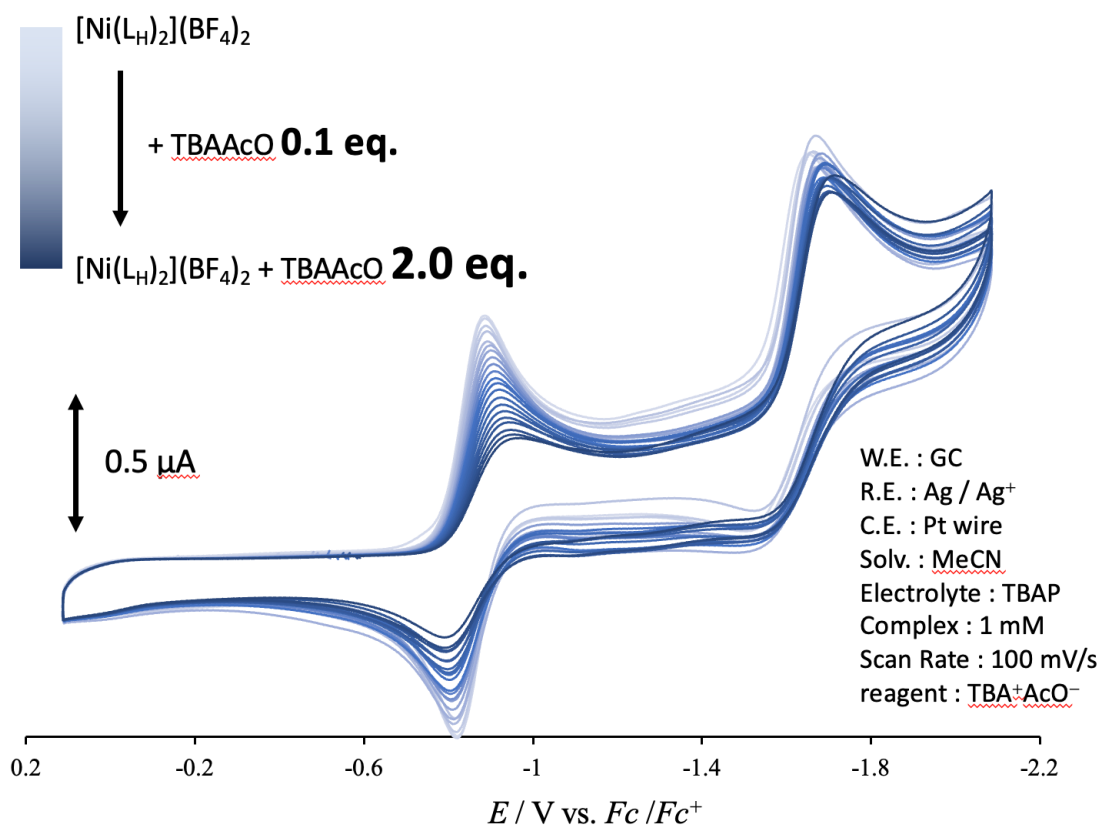

Fig. S13. CVs of complex **1** (1.0 mM) in MeCN containing 0.1 M TBAP in the presence of 0 – 2.0 equiv. of  $\text{TBA}^+\text{AcO}^-$  at room temperature under Ar atmosphere, recorded at a scan rate of 100 mV/s.

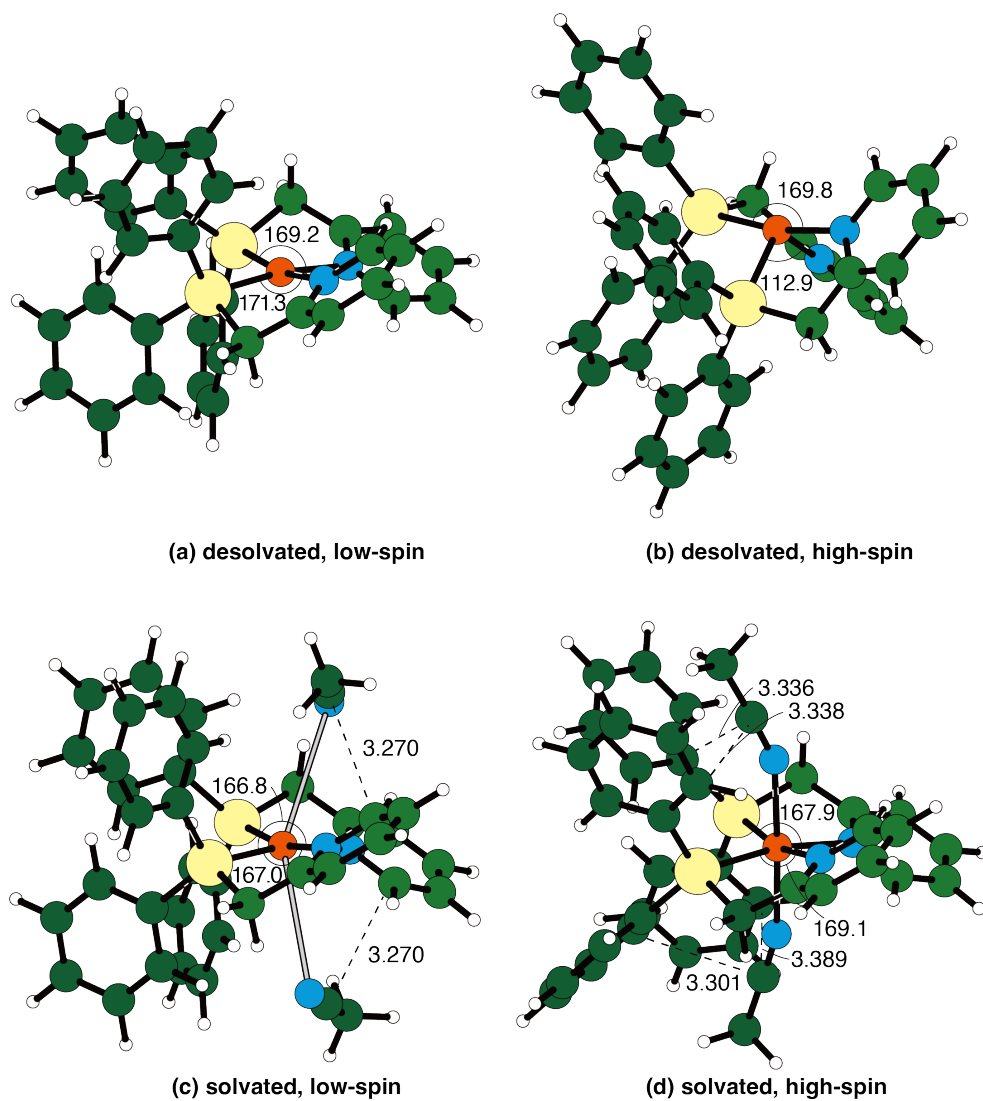

Fig. S14. The optimized structures of the desolvated  $[\text{Ni}^{\text{II}}(\text{L}_{\text{H}})_2]^{2+}$  in (a) the low- and (b) high-spin states and the MeCN-solvated  $[\text{Ni}^{\text{II}}(\text{L}_{\text{H}})_2(\text{MeCN})_2]^{2+}$  in (c) the low- and (d) high-spin states. Red, yellow, blue, green, white circles denote Ni, P, N, C, and H atoms, respectively. Bond angles shown by arcs and the distances shown by dashed lines are in degrees and angstroms, respectively.

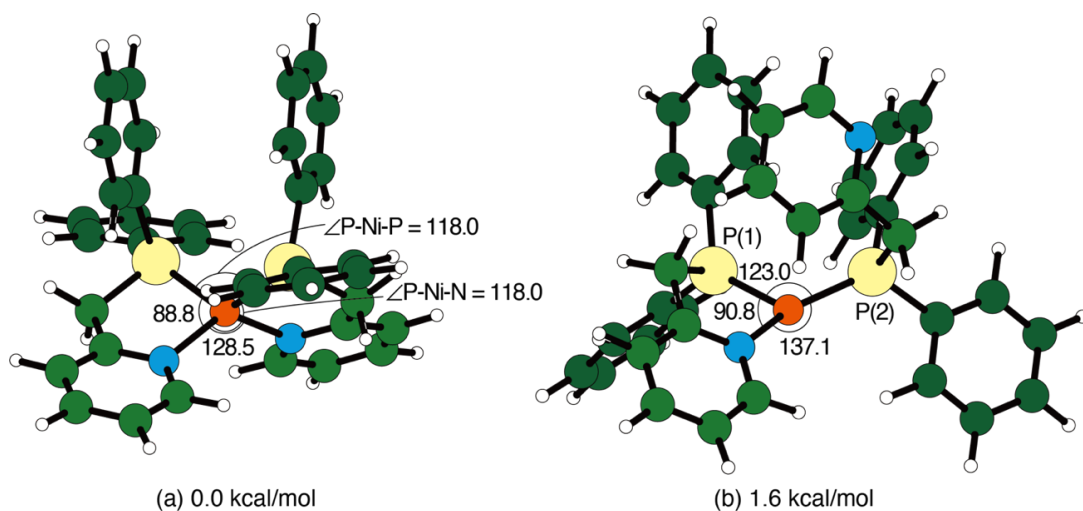

Fig. S15. The optimized structures of Ni(0) complex,  $[\text{Ni}^0(\text{L}_\text{H})_2]^0$ , together with the relative energies in Gibbs free energy at 298.15 K. (a) The four-coordinated structure with bond lengths of Ni—P = 2.130 Å and Ni—N = 2.005 Å, respectively. (b) The three-coordinated structure with a free pyridyl group and bond lengths of Ni—P(1) = 2.119 Å, Ni—P(2) = 2.098 Å, and Ni—N = 1.936 Å. Color scheme is as in Fig. S14. Bond angles are in degrees.



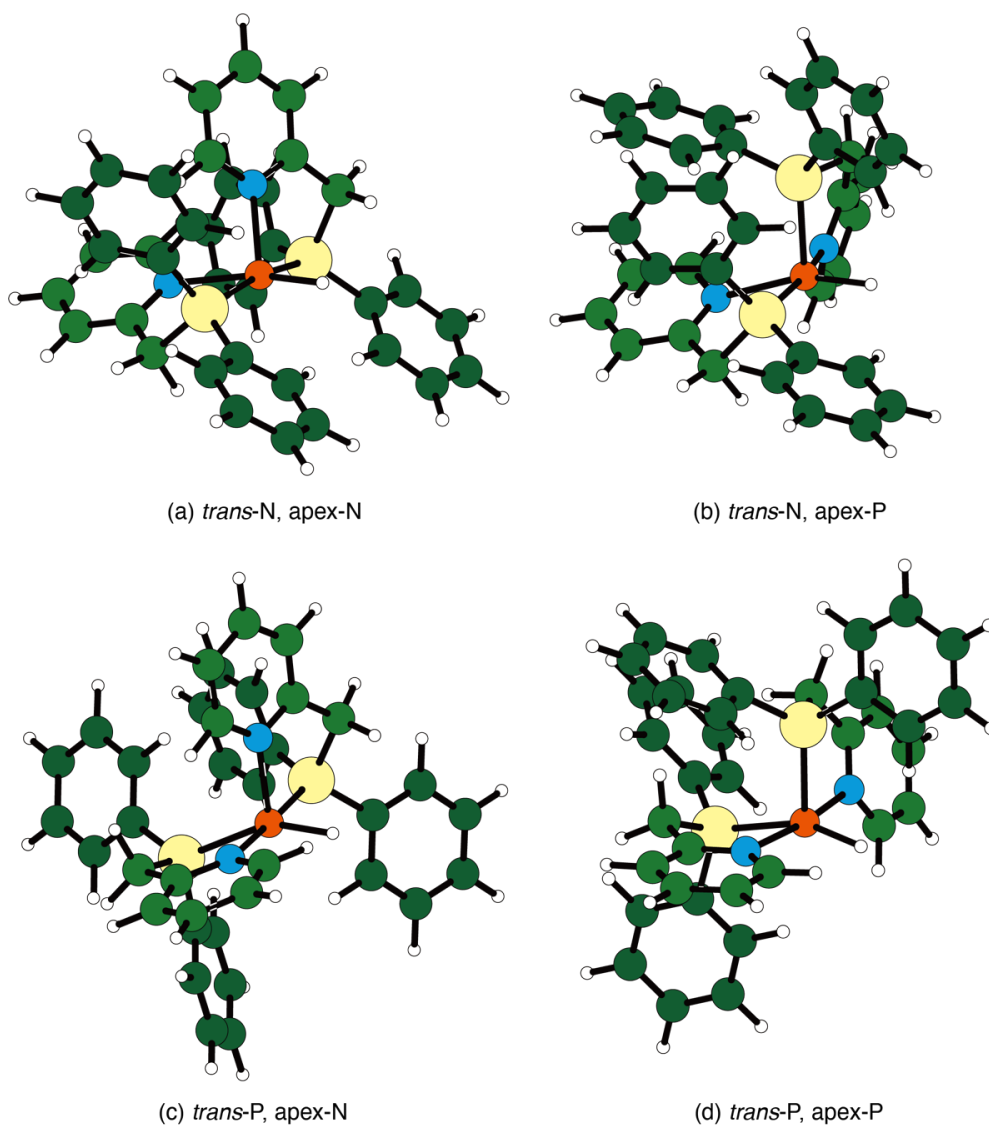

Fig. S16. The optimized structures of desolvated high-spin hydride Ni(II) complexes. Color scheme and classification of square pyramidal structures are as in Fig. S14.

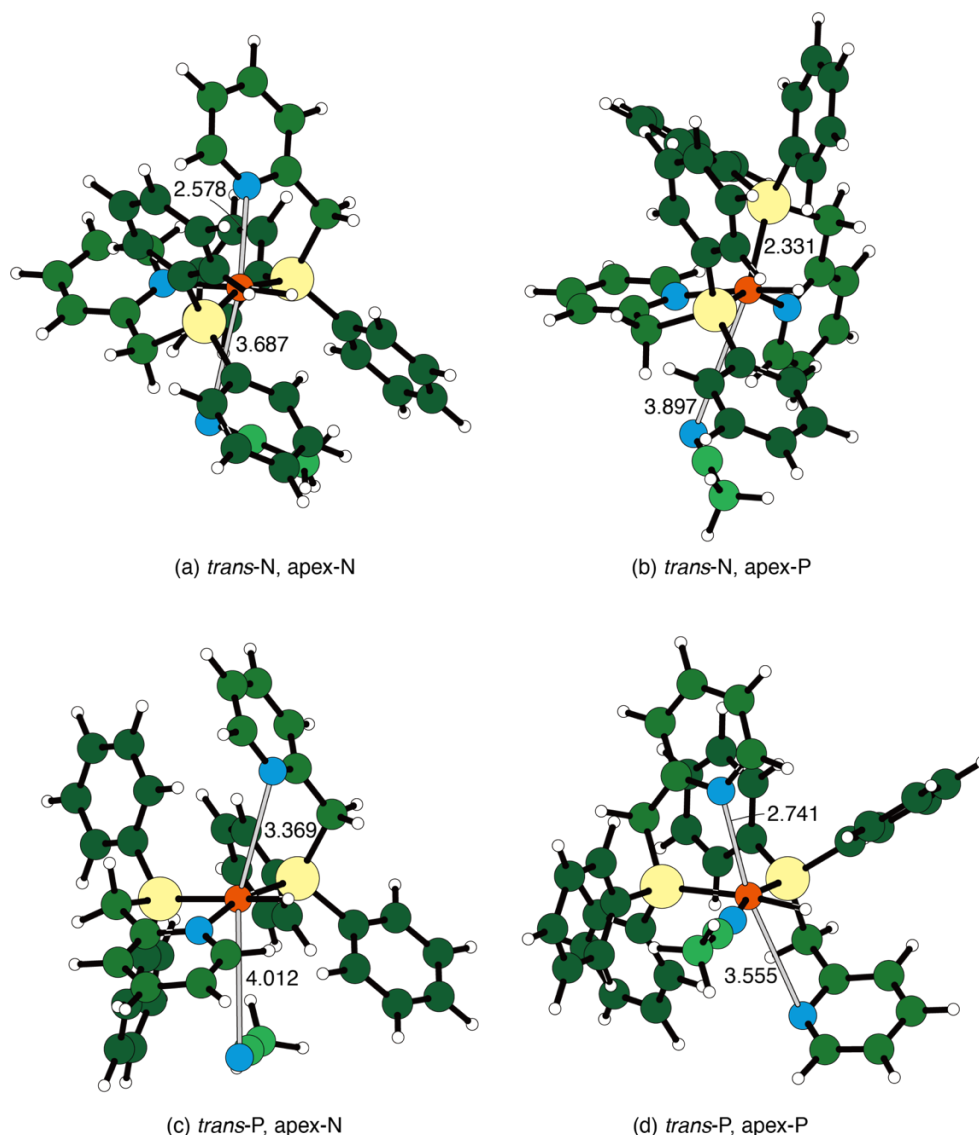

Fig. S17. The optimized structures of the mono-MeCN-solvated low-spin hydride Ni(II) complexes. Color scheme is as in Fig. S14. Gray sticks between donor atoms and Ni center represent distances longer than 2.5 Å. The distances are shown in Å. The labeling of the structures is the same as the original desolated analogues in Fig. S14, because the MeCN ligation, which occurs at the empty site of the desolated complexes, has no significant effect on the coordination geometry, except that some ligands are pushed away from the Ni centre.

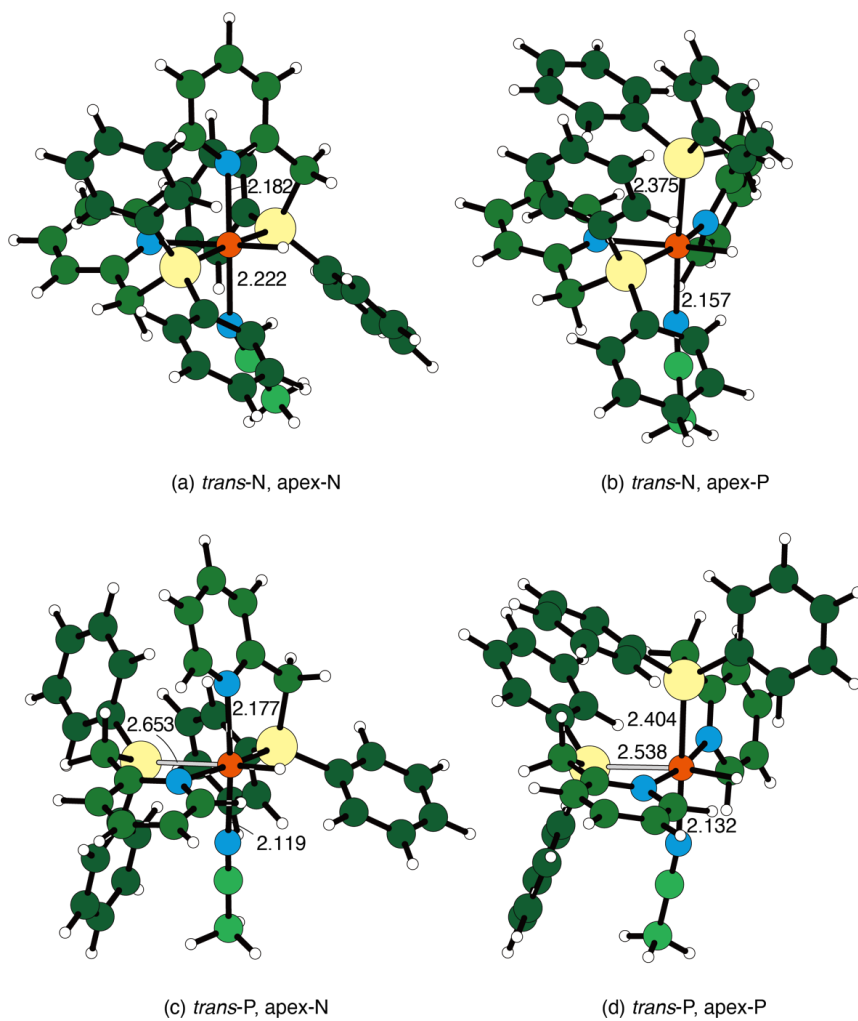

Fig. S18. The optimized structures of mono-MeCN-solvated high-spin hydride Ni(II) complexes. Color scheme and classification of square pyramidal structures are as in Fig. S14. The bond lengths are shown in Å.

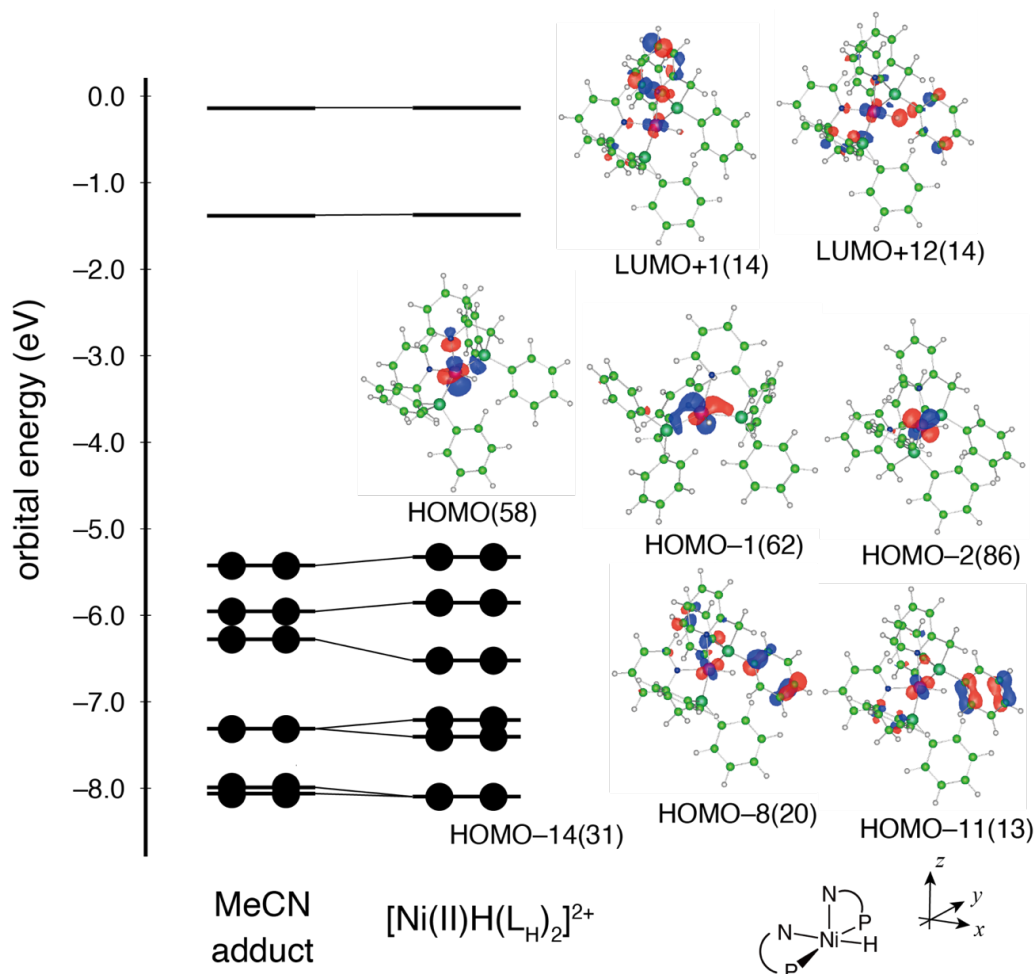

Fig. S19. Orbital energy level diagrams of the low-spin (*trans*-N, apex-N) hydride Ni(II) complex  $[\text{Ni}^{\text{II}}\text{H}(\text{L}_\text{H})_2]^{2+}$  (right side) and its mono-MeCN-solvated analogue (left side). The orbitals assigned to the d orbital on the Ni centre and the 1s orbital on the hydrido ligand are depicted. The values in parentheses indicate the percentage of d-orbital components. The orbital isosurfaces are  $\pm 0.06$  a.u. The orbital diagram of the HOMO-14 is shown in Fig. S20(a). The splitting levels of orbital energies mean that the orbitals contain the same orbital component: e.g. the  $3d_{xy}$  orbital on the Ni centre is mixed in the HOMO-8 and HOMO-11. Certain weights of the  $d_{x^2-y^2}$  orbital are found in the LUMO+1 and LUMO+12.

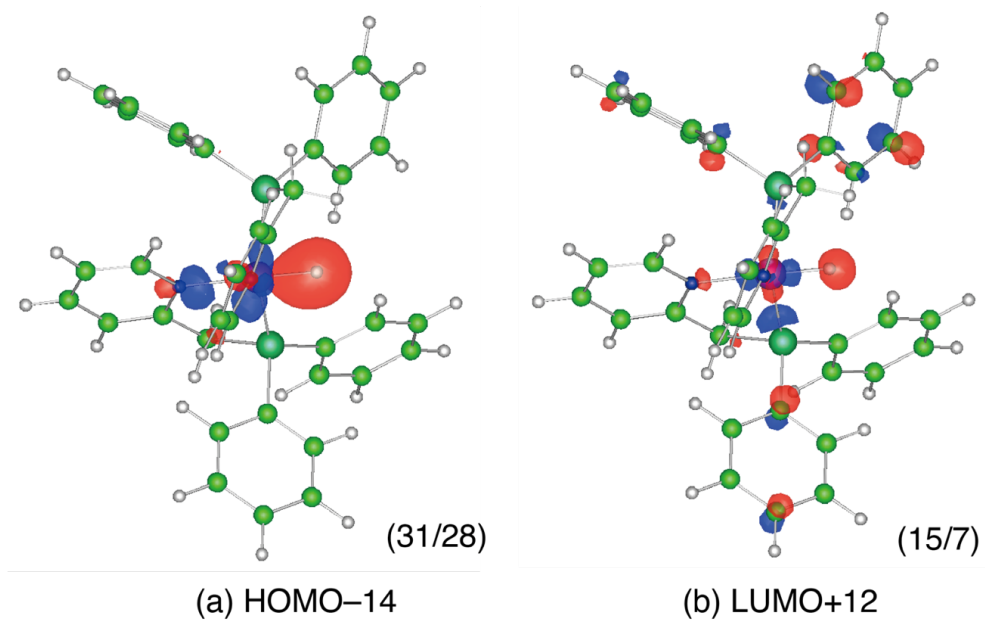

Fig. S20. The Ni—H (a) bonding and (b) antibonding orbitals. The values of orbital isosurfaces are  $\pm 0.06$  a.u. The values in parentheses indicate the weight proportion of atomic orbitals in the Ni(3d) and H(1s) orbitals, for example (Ni(3d)/H(1s)).

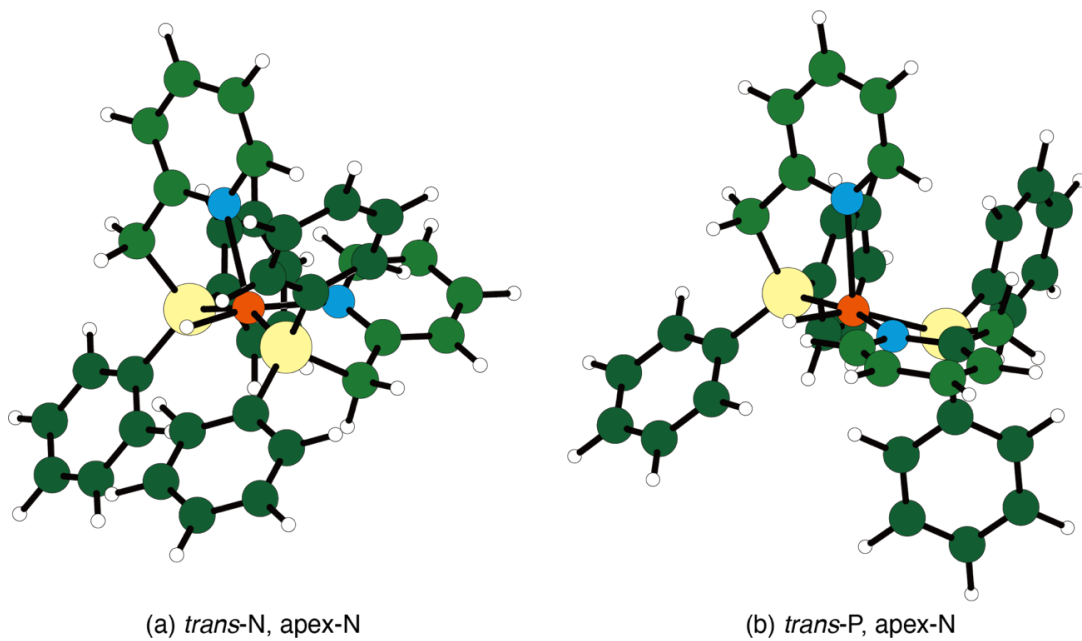

Fig. S21. The optimized structures of the N-apex enantiomers of the desolvated low-spin hydride Ni(II) complexes. Color scheme and classification of square pyramidal structures are as in Fig. S14: (a) the enantiomer of Fig. 6(a), (b) the enantiomer of Fig. 6(c).

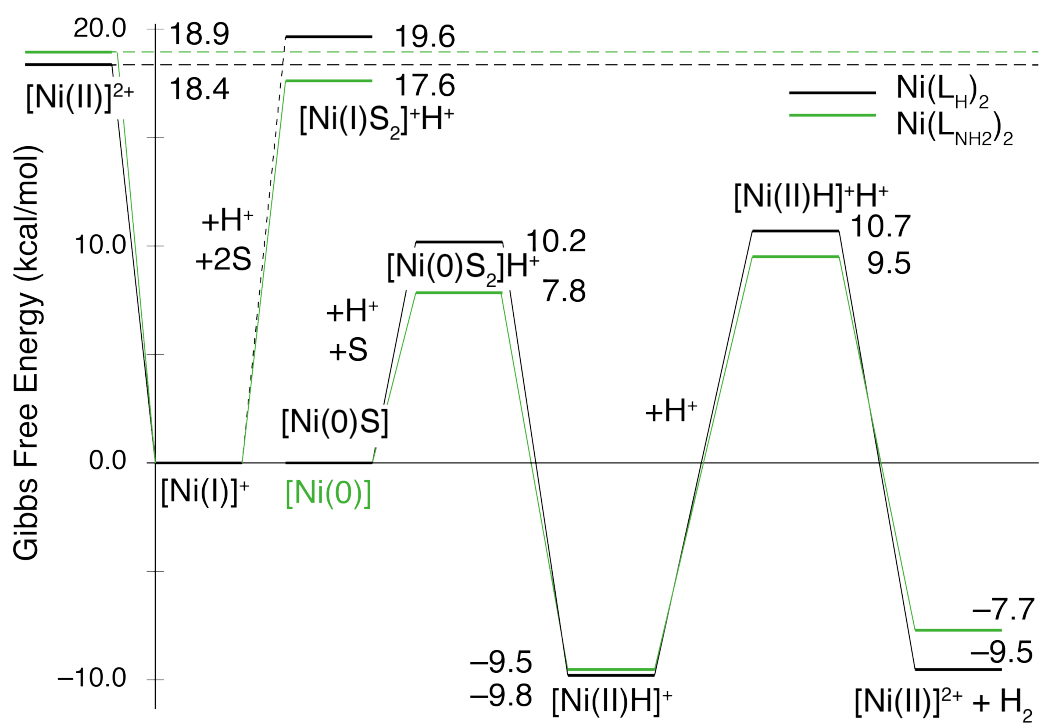

Fig. S22. The energy diagrams for the complex **1**,  $[\text{Ni}^{\text{II}}(\text{L}_\text{H})_2]^{2+}$ , and  $[\text{Ni}^{\text{II}}(\text{L}_{\text{NH}_2})_2]^{2+}$  systems. The representation of species is as in Fig. 7. The free energy diagrams are plotted at an electrode potential equal to the  $\text{Ni}^{\text{I}}/\text{Ni}^0$  reduction potential, and no free energy change for  $\text{Ni}^{\text{I}}/\text{Ni}^0$  reduction. The dashed line connecting the potential energy levels for the protonation step of  $[\text{Ni}^{\text{I}}(\text{L}_\text{H})_2]^+$  represents a reaction step to the thermodynamically unfavorable product.

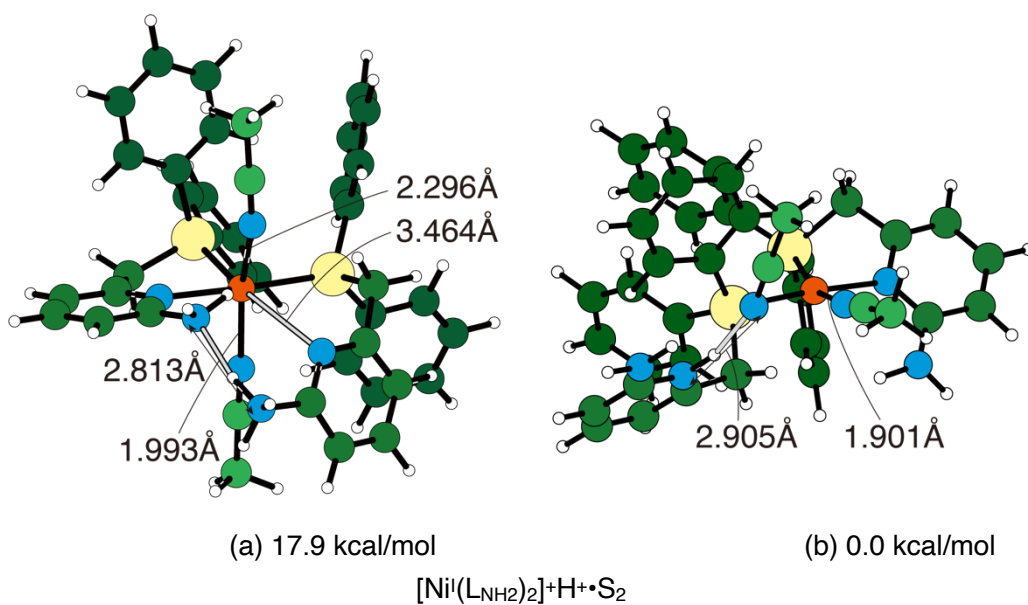

Fig. S23. Optimized structures of the protonated Ni(I) complex with two explicit solvent molecules for  $[\text{Ni}^{\text{II}}(\text{L}_{\text{NH}_2})_2]^{2+}$  systems: (a) an ammonium group forming an intramolecular H-bond to the amine group of the other ligand, (b) a pyridinium H-bonding to an MeCN molecule. Color scheme is as in Fig. S14, and formula symbols are as in Fig. 7. Gray bonds are H-bonds with distances between N atoms.



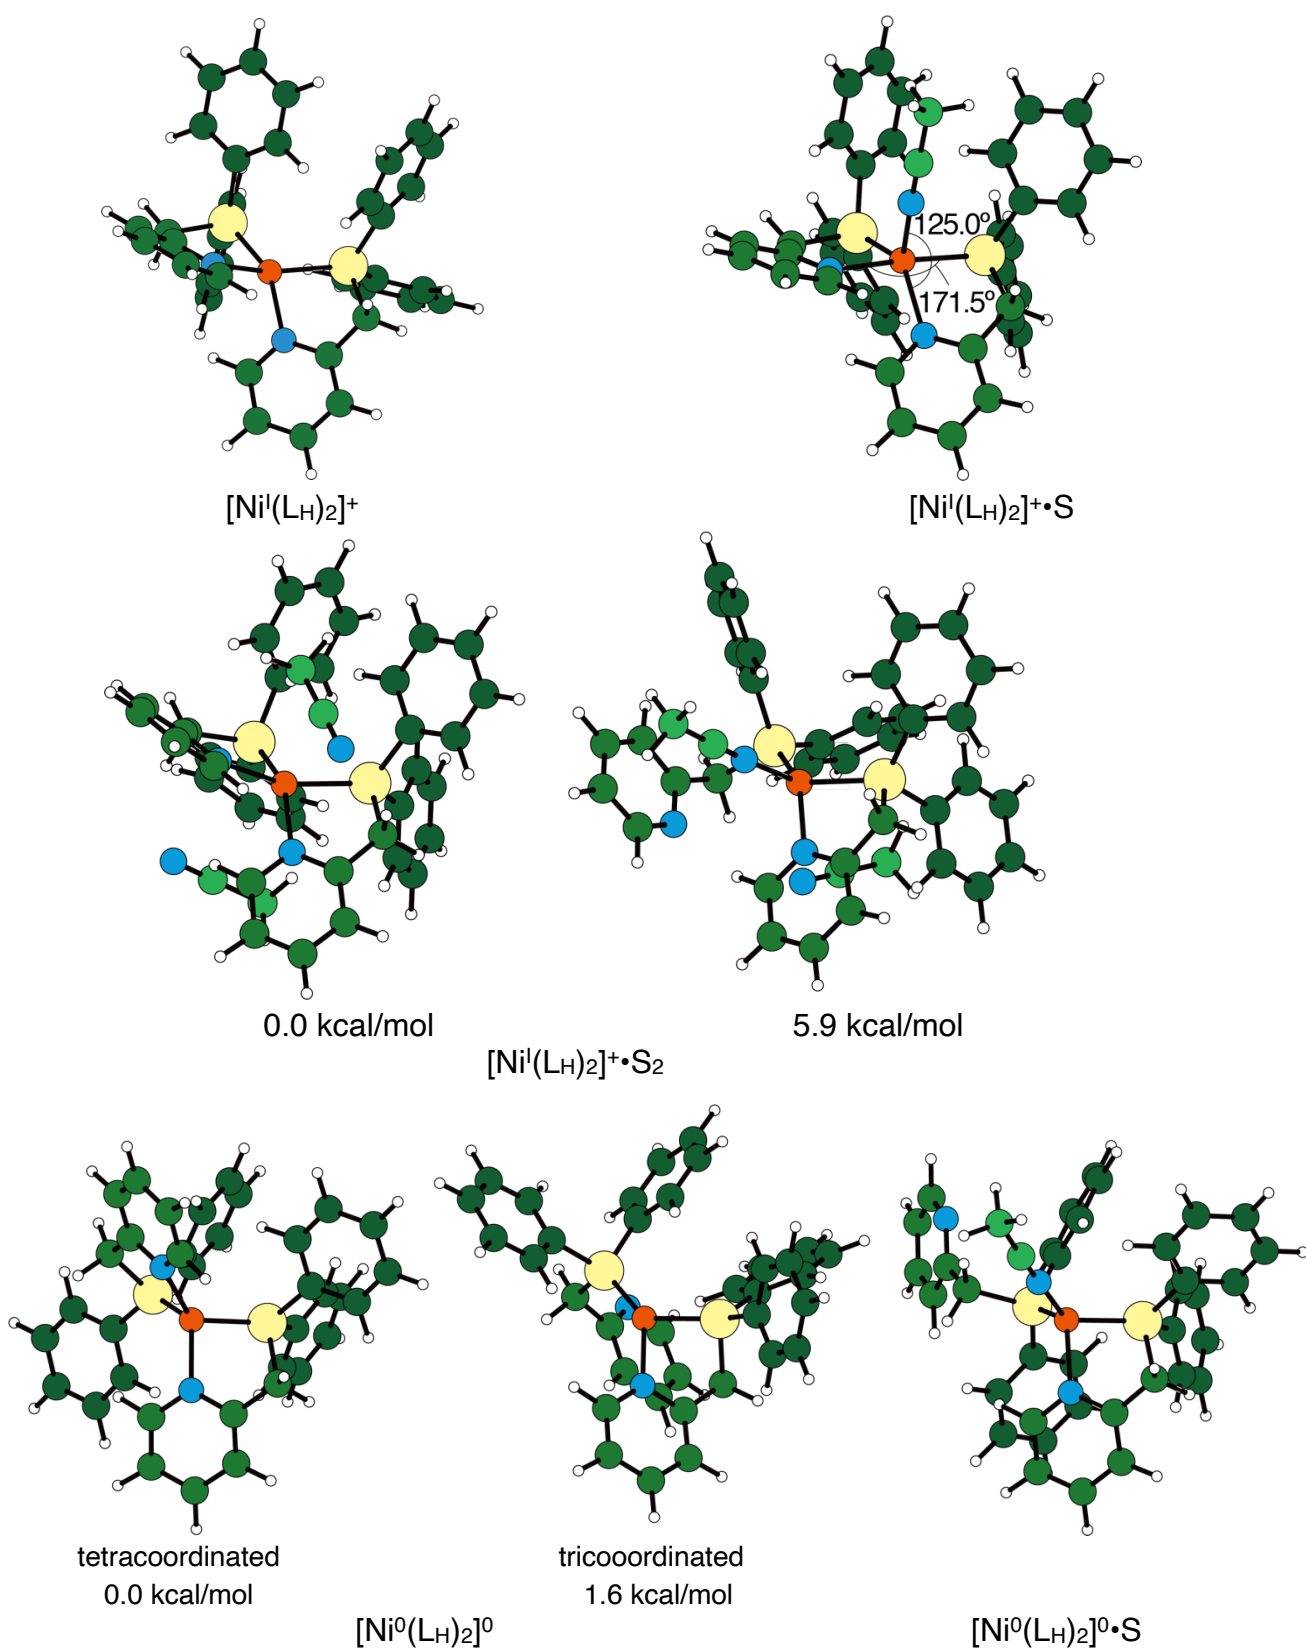

Fig. S24. Optimized structures of deprotonated complexes for  $[\text{Ni}^{\text{II}}(\text{L}_\text{H})_2]^{2+}$  systems. Color scheme is as in Fig. S14, and formula symbols are as in Fig. 7. Relative energies between isomers are shown.

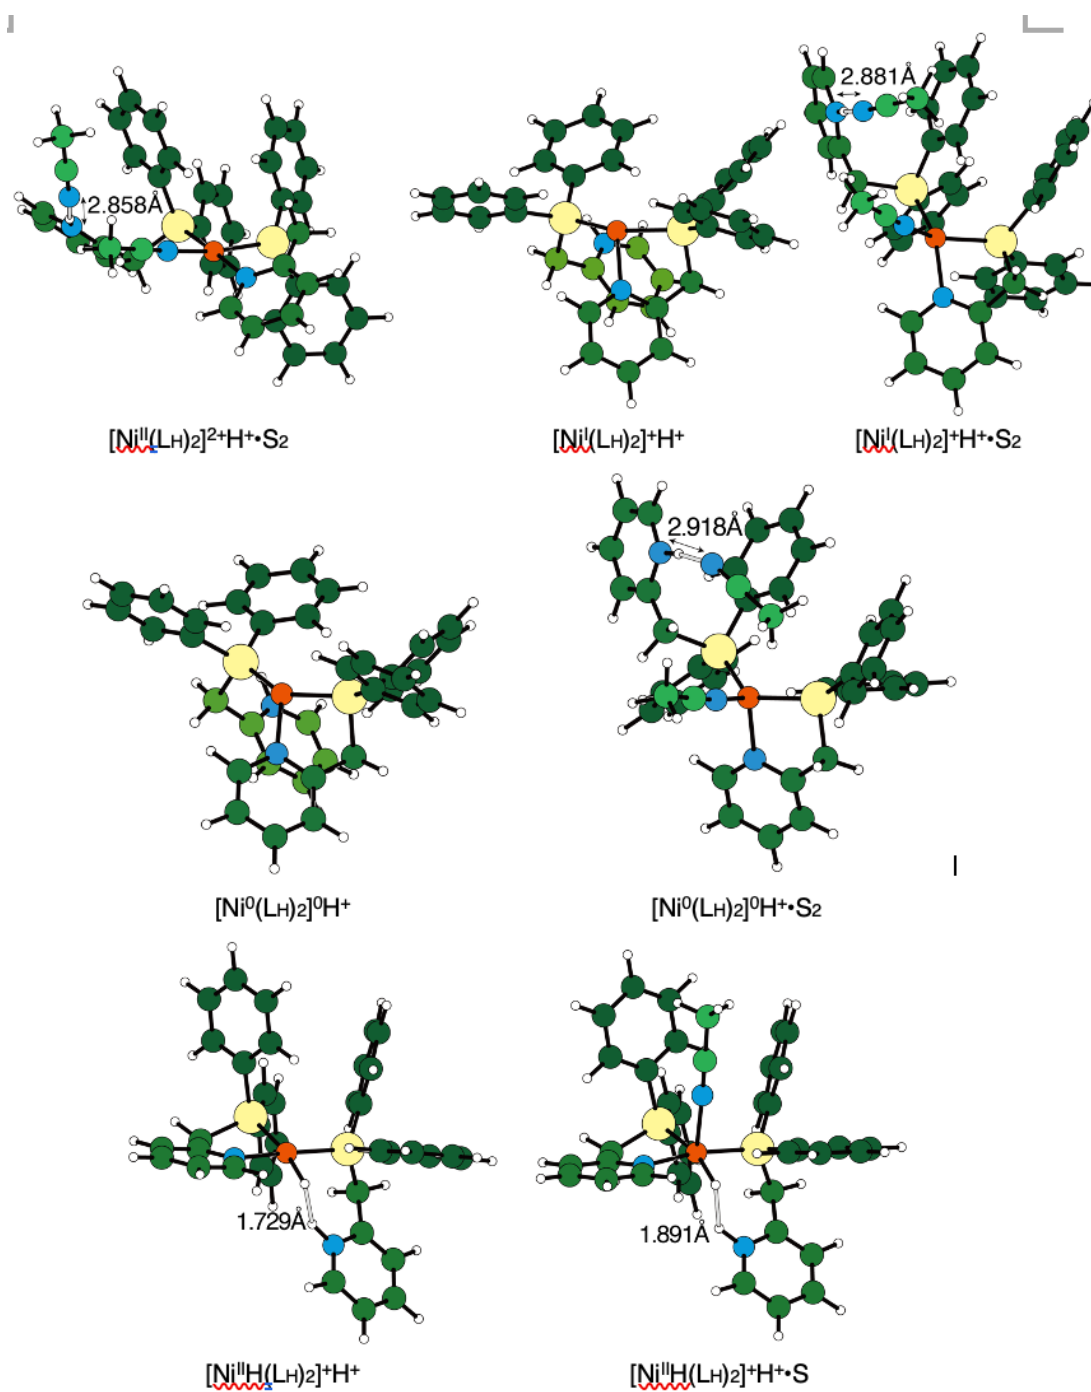

Fig. S25 Optimized structures of protonated complexes for  $[Ni^{II}(LH)_2]^{2+}$  systems. Color scheme as in Fig. S14 and formula symbols are as in Fig. 7. Gray bonds are hydrogen bonds with distances between N or H atoms for  $[Ni^{II}(LH)_2]^{2+}H^+$  and hydride complexes, respectively.

Table S1. Crystallographic details of [Ni(L<sub>H</sub>)<sub>2</sub>](BF<sub>4</sub>)<sub>2</sub> (1)

---

|                                             |                                                                                               |
|---------------------------------------------|-----------------------------------------------------------------------------------------------|
| Empirical Formula                           | C <sub>36</sub> H <sub>32</sub> B <sub>2</sub> F <sub>8</sub> N <sub>2</sub> NiP <sub>2</sub> |
| Formula Weight                              | 786.92                                                                                        |
| Crystal System                              | orthorhombic                                                                                  |
| <i>a</i> /Å                                 | 24.171(2)                                                                                     |
| <i>b</i> /Å                                 | 27.647(2)                                                                                     |
| <i>c</i> /Å                                 | 10.3577(6)                                                                                    |
| <i>V</i> /Å <sup>3</sup>                    | 6921.6(7)                                                                                     |
| Space Group                                 | <i>Fdd2</i> (#43)                                                                             |
| Z value                                     | 8                                                                                             |
| <i>D</i> <sub>calc</sub> /g/cm <sup>3</sup> | 1.510                                                                                         |
| R1 ( <i>I</i> >2.00σ( <i>I</i> ))           | 0.0216                                                                                        |
| R (All reflections)                         | 0.0372                                                                                        |
| wR2 (All reflections)                       | 0.0484                                                                                        |
| Goodness of Fit                             | 0.972                                                                                         |
| Max Shift/Error                             | 0.002                                                                                         |

---

Table S2. Bond lengths (Å) and angles (deg) for [Ni(L<sub>H</sub>)<sub>2</sub>](BF<sub>4</sub>)<sub>2</sub> (1)

| atom | atom | distance  | atom | atom | distance  |
|------|------|-----------|------|------|-----------|
| Ni1  | P1   | 2.1760(6) | Ni1  | P11  | 2.1760(6) |
| Ni1  | N1   | 1.952(2)  | Ni1  | N11  | 1.952(2)  |
| P1   | C3   | 1.835(3)  | P1   | C5   | 1.809(3)  |
| P1   | C7   | 1.803(3)  | F2   | B18  | 1.379(4)  |
| F6   | B18  | 1.371(4)  | F10  | B18  | 1.386(4)  |
| F21  | B18  | 1.361(4)  | N1   | C9   | 1.360(3)  |
| N1   | C16  | 1.347(3)  | C3   | C91  | 1.487(4)  |
| C4   | C7   | 1.398(4)  | C4   | C24  | 1.379(4)  |
| C5   | C11  | 1.391(3)  | C5   | C12  | 1.394(4)  |
| C7   | C8   | 1.395(4)  | C8   | C22  | 1.391(4)  |
| C9   | C19  | 1.378(4)  | C11  | C13  | 1.387(4)  |
| C12  | C14  | 1.383(4)  | C13  | C15  | 1.373(4)  |
| C14  | C15  | 1.383(4)  | C16  | C20  | 1.385(4)  |
| C17  | C19  | 1.382(4)  | C17  | C20  | 1.376(5)  |
| C22  | C23  | 1.369(5)  | C23  | C24  | 1.386(4)  |
| C3   | H3A  | 0.990     | C3   | H3B  | 0.990     |
| C4   | H4   | 0.950     | C8   | H8   | 0.950     |
| C11  | H11  | 0.950     | C12  | H12  | 0.950     |
| C13  | H13  | 0.950     | C14  | H14  | 0.950     |
| C15  | H15  | 0.950     | C16  | H16  | 0.950     |
| C17  | H17  | 0.950     | C19  | H19  | 0.950     |
| C20  | H20  | 0.950     | C22  | H22  | 0.950     |
| C23  | H23  | 0.950     | C24  | H24  | 0.950     |

| atom | atom | atom | angle      | atom | atom | atom | angle      |
|------|------|------|------------|------|------|------|------------|
| P1   | Ni1  | P11  | 99.53(3)   | P1   | Ni1  | N1   | 162.22(5)  |
| P1   | Ni1  | N11  | 84.50(6)   | P11  | Ni1  | N1   | 84.50(6)   |
| P11  | Ni1  | N11  | 162.22(5)  | N1   | Ni1  | N11  | 96.96(9)   |
| Ni1  | P1   | C3   | 98.32(8)   | Ni1  | P1   | C5   | 117.19(9)  |
| Ni1  | P1   | C7   | 121.06(8)  | C3   | P1   | C5   | 106.45(11) |
| C3   | P1   | C7   | 105.87(11) | C5   | P1   | C7   | 106.12(11) |
| Ni1  | N1   | C9   | 121.15(15) | Ni1  | N1   | C16  | 119.92(17) |
| C9   | N1   | C16  | 118.2(2)   | P1   | C3   | C91  | 106.69(16) |
| C7   | C4   | C24  | 119.8(3)   | P1   | C5   | C11  | 120.16(19) |
| P1   | C5   | C12  | 120.15(16) | C11  | C5   | C12  | 119.5(2)   |
| P1   | C7   | C4   | 119.18(18) | P1   | C7   | C8   | 120.71(19) |
| C4   | C7   | C8   | 120.1(3)   | C7   | C8   | C22  | 118.8(3)   |
| N1   | C9   | C31  | 115.7(2)   | N1   | C9   | C19  | 121.6(3)   |
| C31  | C9   | C19  | 122.7(3)   | C5   | C11  | C13  | 119.8(3)   |
| C5   | C12  | C14  | 120.0(2)   | C11  | C13  | C15  | 120.4(3)   |
| C12  | C14  | C15  | 120.1(3)   | C13  | C15  | C14  | 120.2(3)   |
| N1   | C16  | C20  | 122.5(3)   | C19  | C17  | C20  | 119.3(3)   |
| C9   | C19  | C17  | 119.5(3)   | C16  | C20  | C17  | 118.8(3)   |
| C8   | C22  | C23  | 120.9(3)   | C22  | C23  | C24  | 120.3(3)   |
| C4   | C24  | C23  | 120.0(3)   | F2   | B18  | F6   | 110.4(3)   |
| F2   | B18  | F10  | 108.3(3)   | F2   | B18  | F21  | 108.7(3)   |
| F6   | B18  | F10  | 108.2(3)   | F6   | B18  | F21  | 110.5(3)   |
| F10  | B18  | F21  | 110.7(3)   |      |      |      |            |
| P1   | C3   | H3A  | 110.4      | P1   | C3   | H3B  | 110.4      |
| C91  | C3   | H3A  | 110.4      | C91  | C3   | H3B  | 110.4      |
| H3A  | C3   | H3B  | 108.6      | C7   | C4   | H4   | 120.1      |
| C24  | C4   | H4   | 120.1      | C7   | C8   | H8   | 120.6      |
| C22  | C8   | H8   | 120.6      | C5   | C11  | H11  | 120.1      |
| C13  | C11  | H11  | 120.1      | C5   | C12  | H12  | 120.0      |
| C14  | C12  | H12  | 120.0      | C11  | C13  | H13  | 119.8      |
| C15  | C13  | H13  | 119.8      | C12  | C14  | H14  | 119.9      |
| C15  | C14  | H14  | 120.0      | C13  | C15  | H15  | 119.9      |
| C14  | C15  | H15  | 119.9      | N1   | C16  | H16  | 118.7      |
| C20  | C16  | H16  | 118.8      | C19  | C17  | H17  | 120.3      |
| C20  | C17  | H17  | 120.4      | C9   | C19  | H19  | 120.3      |

|     |     |     |       |     |     |     |       |
|-----|-----|-----|-------|-----|-----|-----|-------|
| C17 | C19 | H19 | 120.2 | C16 | C20 | H20 | 120.6 |
| C17 | C20 | H20 | 120.6 | C8  | C22 | H22 | 119.5 |
| C23 | C22 | H22 | 119.5 | C22 | C23 | H23 | 119.8 |
| C24 | C23 | H23 | 119.8 | C4  | C24 | H24 | 120.0 |
| C23 | C24 | H24 | 120.0 |     |     |     |       |

Table S3. Torsion angles (deg) for [NiL<sub>2</sub>](BF<sub>4</sub>)<sub>2</sub> (1)

(Those having bond angles &gt; 160 or &lt; 20 degrees are excluded.)

| atom1 | atom2 | atom3 | atom4 | angle       |
|-------|-------|-------|-------|-------------|
| P1    | Ni1   | P11   | C31   | 171.46(2)   |
| P1    | Ni1   | P11   | C51   | 58.07(3)    |
| P1    | Ni1   | P11   | C71   | -74.29(4)   |
| P11   | Ni1   | P1    | C3    | 171.46(2)   |
| P11   | Ni1   | P1    | C5    | 58.07(3)    |
| P11   | Ni1   | P1    | C7    | -74.29(4)   |
| P1    | Ni1   | N11   | C91   | 14.10(11)   |
| P1    | Ni1   | N11   | C161  | -156.18(12) |
| N11   | Ni1   | P1    | C3    | -26.02(5)   |
| N11   | Ni1   | P1    | C5    | -139.40(6)  |
| N11   | Ni1   | P1    | C7    | 88.23(6)    |
| P11   | Ni1   | N1    | C9    | 14.10(11)   |
| P11   | Ni1   | N1    | C16   | -156.18(12) |
| N1    | Ni1   | P11   | C31   | -26.02(5)   |
| N1    | Ni1   | P11   | C51   | -139.40(6)  |
| N1    | Ni1   | P11   | C71   | 88.23(6)    |
| N1    | Ni1   | N11   | C91   | -148.07(12) |
| N1    | Ni1   | N11   | C161  | 41.65(13)   |
| N11   | Ni1   | N1    | C9    | -148.07(12) |
| N11   | Ni1   | N1    | C16   | 41.65(13)   |
| Ni1   | P1    | C3    | C91   | 37.02(13)   |
| Ni1   | P1    | C5    | C11   | 71.91(18)   |
| Ni1   | P1    | C5    | C12   | -103.31(16) |
| Ni1   | P1    | C7    | C4    | -176.78(11) |
| Ni1   | P1    | C7    | C8    | 3.0(2)      |
| C3    | P1    | C5    | C11   | -36.8(2)    |
| C3    | P1    | C5    | C12   | 147.95(17)  |
| C5    | P1    | C3    | C91   | 158.67(13)  |
| C3    | P1    | C7    | C4    | -66.48(18)  |
| C3    | P1    | C7    | C8    | 113.30(17)  |
| C7    | P1    | C3    | C91   | -88.69(15)  |
| C5    | P1    | C7    | C4    | 46.39(19)   |
| C5    | P1    | C7    | C8    | -133.83(16) |

|     |     |     |      |             |
|-----|-----|-----|------|-------------|
| C7  | P1  | C5  | C11  | -149.30(17) |
| C7  | P1  | C5  | C12  | 35.5(2)     |
| Ni1 | N1  | C9  | C31  | 9.4(3)      |
| Ni1 | N1  | C9  | C19  | -169.55(13) |
| Ni1 | N1  | C16 | C20  | 170.83(13)  |
| C9  | N1  | C16 | C20  | 0.3(3)      |
| C16 | N1  | C9  | C31  | 179.83(17)  |
| C16 | N1  | C9  | C19  | 0.9(3)      |
| P1  | C3  | C91 | N11  | -32.4(3)    |
| P1  | C3  | C91 | C191 | 146.54(16)  |
| C7  | C4  | C24 | C23  | 0.5(4)      |
| C24 | C4  | C7  | P1   | -177.7(2)   |
| C24 | C4  | C7  | C8   | 2.5(4)      |
| P1  | C5  | C11 | C13  | -176.06(17) |
| P1  | C5  | C12 | C14  | 174.43(15)  |
| C11 | C5  | C12 | C14  | -0.8(4)     |
| C12 | C5  | C11 | C13  | -0.8(4)     |
| P1  | C7  | C8  | C22  | 176.56(16)  |
| C4  | C7  | C8  | C22  | -3.7(4)     |
| C7  | C8  | C22 | C23  | 1.7(4)      |
| N1  | C9  | C19 | C17  | -1.7(4)     |
| C31 | C9  | C19 | C17  | 179.45(19)  |
| C5  | C11 | C13 | C15  | 2.1(5)      |
| C5  | C12 | C14 | C15  | 1.2(4)      |
| C11 | C13 | C15 | C14  | -1.7(5)     |
| C12 | C14 | C15 | C13  | 0.0(4)      |
| N1  | C16 | C20 | C17  | -0.6(4)     |
| C19 | C17 | C20 | C16  | -0.2(4)     |
| C20 | C17 | C19 | C9   | 1.3(4)      |
| C8  | C22 | C23 | C24  | 1.3(5)      |
| C22 | C23 | C24 | C4   | -2.5(5)     |



ORTEP drawing of complex 1 with 50 % ellipsoid probability.

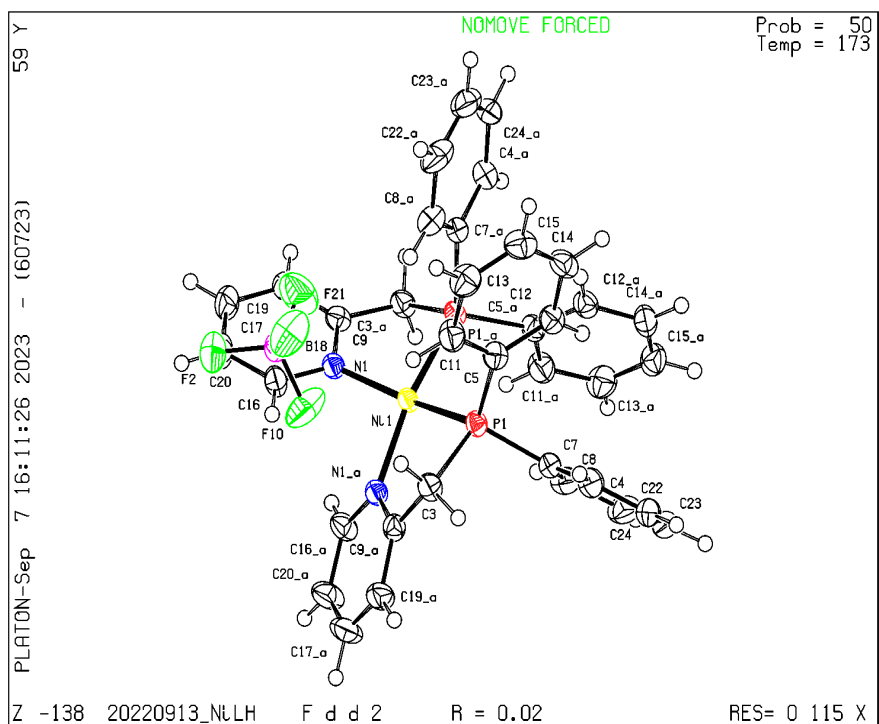

Table S4. Calculated solvation energies for species with and without protons for  $[\text{Ni}^{\text{II}}(\text{L}_{\text{NH}_2})_2]^{2+}$  and  $[\text{Ni}^{\text{II}}(\text{L}_{\text{H}})_2]^{2+}$  systems (kcal/mol).

| coordination, spin state <sup>a</sup> |                            | NH <sub>2</sub> |       | H    |      |
|---------------------------------------|----------------------------|-----------------|-------|------|------|
|                                       |                            | 1               | 2     | 1    | 2    |
| N(II) <sup>b</sup>                    | hexacoordinated, high-spin |                 | 3.1   |      | 1.3  |
|                                       | tetracoordinated, low-spin |                 | 1.0   |      | 1.6  |
| Ni(I)                                 | tetracoordinated           | 5.8             | 5.1   | 5.9  | 2.4  |
|                                       | leaving pyridyl            |                 | 8.9   |      | 7.4  |
| Ni(0)                                 | leaving pyridyl            | 0.7             |       | -0.7 |      |
| Ni(II)H                               | leaving pyridyl            | 1.5             |       | 0.1  |      |
| protonated                            |                            |                 |       |      |      |
| Ni(II) <sup>b</sup>                   | hexacoordinated, high-spin |                 | -6.5  |      |      |
|                                       | tetracoordinated, low-spin |                 | -6.5  |      |      |
|                                       | leaving ammoniumpyridyl    |                 | -8.6  |      |      |
|                                       | leaving pyridinium         |                 | -20.7 |      |      |
| Ni(I)                                 | pentacoordinated           |                 | 10.3  |      |      |
|                                       | leaving pyridinium         |                 | -7.5  |      | -9.0 |
| Ni(0)                                 | leaving pyridinium         |                 | -3.4  |      | -3.7 |
| Ni(II)H                               | leaving pyridyl            | 2.4             |       | 4.5  |      |

<sup>a</sup> The coordination number represents the number of donor atoms in the first coordination shell.

<sup>b</sup> The desolvated complex is in the low-spin state.

Table S5. Relative energies, Ni—H bond lengths, and natural atomic charges of hydride Ni(II) intermediates,  $[\text{Ni}^{\text{II}}\text{H}(\text{L}_{\text{NH}_2})_2]^+$ .

| <i>trans</i> atom of H <sup>-</sup> | N                  |                    | P                  |                   |
|-------------------------------------|--------------------|--------------------|--------------------|-------------------|
|                                     | N                  | P                  | N                  | P                 |
| apex atom                           |                    |                    |                    |                   |
| $\Delta G$ (kcal/mol)               | 1.0                | 2.6                | 0.0                | 9.7               |
| Ni—H bond (Å)                       | 1.457              | 1.457              | 1.486              | 1.500             |
| atomic charge                       |                    |                    |                    |                   |
| Ni                                  | 0.76               | 0.80               | 0.75               | 0.88              |
| P                                   | 0.94               | 0.94               | 0.89 <sup>a</sup>  | 0.90 <sup>a</sup> |
| P                                   | 0.92               | 0.85 <sup>b</sup>  | 1.01               | 0.83 <sup>b</sup> |
| N                                   | -0.63 <sup>a</sup> | -0.64 <sup>a</sup> | -0.62              | -0.59             |
| N                                   | -0.63 <sup>b</sup> | -0.65              | -0.61 <sup>b</sup> | -0.58             |
| H                                   | -0.23              | -0.19              | -0.30              | -0.35             |

<sup>a</sup> at the *trans* position of the hydride ligand.

<sup>b</sup> at the apex position.
